# Supplementary material for: Sulfide production and oxidation by heterotrophic bacteria under aerobic conditions
Source: PubMed Central journal article supplement — ISME J. 2017 Aug 4;11(12):2754–66. doi: 10.1038/ismej.2017.125 (PMC5702731; doi:10.1038/ismej.2017.125), 2017-08-04
Supplement: ismej2017125x3.pdf [file ismej2017125x3.pdf]

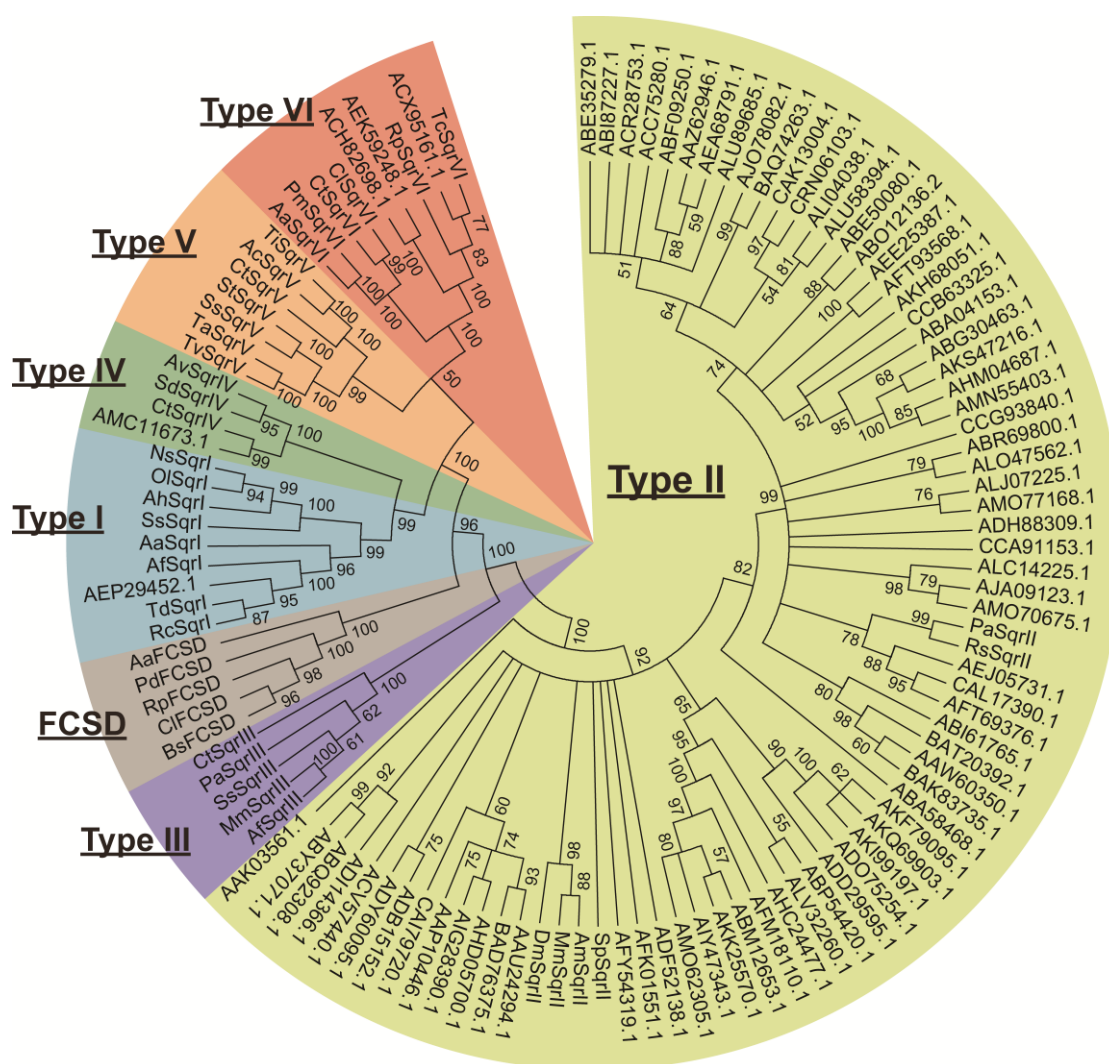

18

19 **Supplementary Figure S1. The phylogenetic tree of representative SQRs whose**  
 20 **genes are physically linked to *pdo* in bacterial genomes. The representative 77 SQR**  
 21 **sequences were used for phylogenetic tree construction with reported seed sequences.**  
 22 **Five flavocytochrome c sulfide dehydrogenase (FCSD) proteins were included as**  
 23 **reference. These sequences were aligned by using clustalW, and the tree was built by**  
 24 **using MEGA6. Reference proteins are listed below, with the organism origin and**  
 25 **accession number: RcSqrI, *R. capsulatus* (CAA66112.1 ); TdSqrI, *T. denitrificans***  
 26 **(AAM52227.1 ); AfSqrI, *A. ferrooxidans* (ABF71988.1 ); AaSqrI, *A. aeolicus***  
 27 **(NP\_214500.1 ); SsSqrI, *S. sp.* (NP\_942192.1 ); AhSqrI, *A. halophytica***  
 28 **(AAF72963.1 ); OISqrI, *O. limnetica* (AAF72962.1 ); NsSqrI, *N. sp.* (NP\_488552.1 );**

29 PaSqrII, *P. aeruginosa* (NP\_251035.1 ); RsSqrII, *R. solanacearum* (NP\_519663.1 );  
30 SpSqrII, *S. pombe* (NP\_596067.1 ); DmSqrII, *D. melanogaster* (NP\_647877.1 );  
31 AmSqrII, *A. marina* (ABV22505.1 ); MmSqrII, *M. musculus* (EDL28115.1 );  
32 AfSqrIII, *A. fulgidus* (NP\_069393.1 ); MmSqrIII, *M. magnetotacticum*  
33 (ZP\_00055086.1 ); CtSqrIII, *C. tepidum* (NP\_661917.1 ); SsSqrIII, *S. solfataricus*  
34 (NP\_343961.1 ); PaSqrIII, *P. aerophilum* (NP\_560139.1 ); SdSqrIV, *S. denitrificans*  
35 (YP\_393133.1 ); AvSqrIV, *A. vinosum* (ZP\_04773162.1 ); CtSqrIV, *C. tepidum*  
36 (NP\_661023.1 ); CtSqrV, *C. tepidum* (NP\_661769.1 ); AcSqrV, *A. caldus*  
37 (ZP\_05293376.1 ); TiSqrV, *T. intermedia* (ZP\_05500015.1 ); TvSqrV, *T. volcanium*  
38 (NP\_111725.1 ); TaSqrV, *T. acidophilum* (NP\_394588.1 ); SsSqrV, *S. solfataricus*  
39 (NP\_343636.1 ); StSqrV, *S. tokodaii* (NP\_378484.1 ); TcSqrVI, *T. crunogena*  
40 (ABB41976.1 ); RpSqrVI, *R. palustris* (YP\_484673.1 ); AaSqrVI, *A. aeolicus*  
41 (NP\_213539.1 ); PmSqrVI, *P. marina* (YP\_002730289.1 ); CtSqrVI, *C. tepidum*  
42 (NP\_661978.1 ); ClSqrVI, *C. luteolum* (YP\_375032.1 ); BsFCSD, *B. sp.*  
43 (ZP\_02001369.1 ); ClFCSD, *C. limicola* (AAL68892.1 ); PdFCSD, *P. denitrificans*  
44 (CAA55826.2 ); RpFCSD, *R. palustris* (YP\_001990584.1 ); AaFCSD, *A. aeolicus*  
45 (NP\_213158.1 ).

46

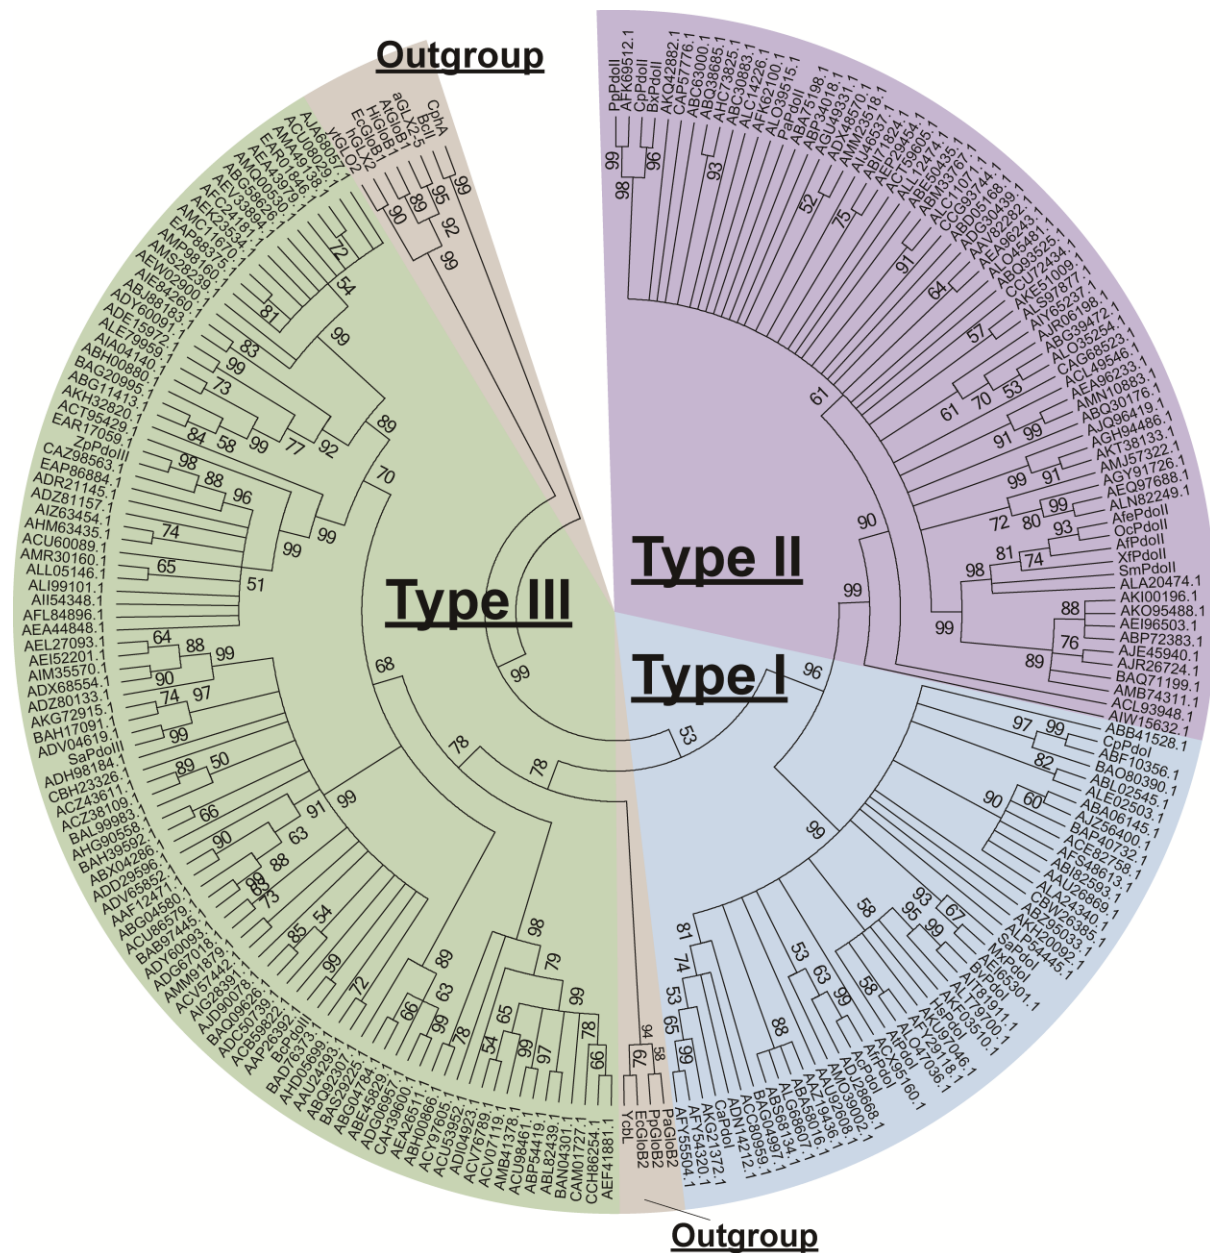

47

48 **Supplementary Figure S2. The phylogenetic tree of selected PDOs in sequenced**49 **bacterial genomes from GenBank. The representative 193 PDO sequences were used for**50 **phylogenetic tree construction with reported seed sequences. These sequences were aligned**51 **by using clustalW, and the tree was built by using MEGA6. Reference proteins are listed**52 **below, with the organism origin and accession number: Type I PDOs: SaPdoI**53 **(YP\_003957083.1), CpPdoI (YP\_297536.1), MxPdoI (YP\_633997.1), HsPdoI**54 **(NP\_055112.2), CaPdoI (YP\_007162862.1), BvPdoI (ZP\_00420127.1), AtPdoI**

55 (NP\_974018.3), AcPdoI (AEK59246.1), AfrPdoI (YP\_002424776.1). Type II PDOs:  
56 OcPdoII, *O. carboxidovorans* (YP\_002287251.1); XfPdoII (NP\_298058.1), SmPdoII  
57 (NP\_435818.1), CpPdoII (YP\_297791.1), PaPdoII (NP\_251605.1), BxPdoII (YP\_554628.1),  
58 AfaPdoII (AAK89929.1), AfePdoII (ZP\_11421028.1); PpPdoII, *P. putida* (ABQ76243.1).  
59 SaPdoIII, *S. aureus* (WP\_000465474.1 ); BcPdoIII, *B. cereus* (EEK49737.1 ); ZpPdoIII, *Z.*  
60 *profunda* (ADF52140.1 ); PaGloB2, *P. aeruginosa* (NP\_249523.1); PpGloB2, *P. putida*  
61 (ABQ76961.1); EcGloB2, *E. coli* (NP\_415447.1); YcbL, *S. enterica* (CAD05397.1);  
62 EcGloB1, *E. coli* (NP\_414748.1); HiGloB1, *H. influenzae* (ADO96205.1); AtGloB1, *A.*  
63 *fabrum* (NP\_356997.2); aGLX2-5, *A. thaliana* (NP\_850166.1); ytGLO2, *S. cerevisiae*  
64 (CAA71335.1); hGLX2, *H. sapiens* (CAA62483.1); BcII, *B. cereus* (AAA22276.1); CphA,  
65 *A. hydrophila* (CAA40386.1).

66  
67

68

69

70

71

72

73

74

75

76

77

78

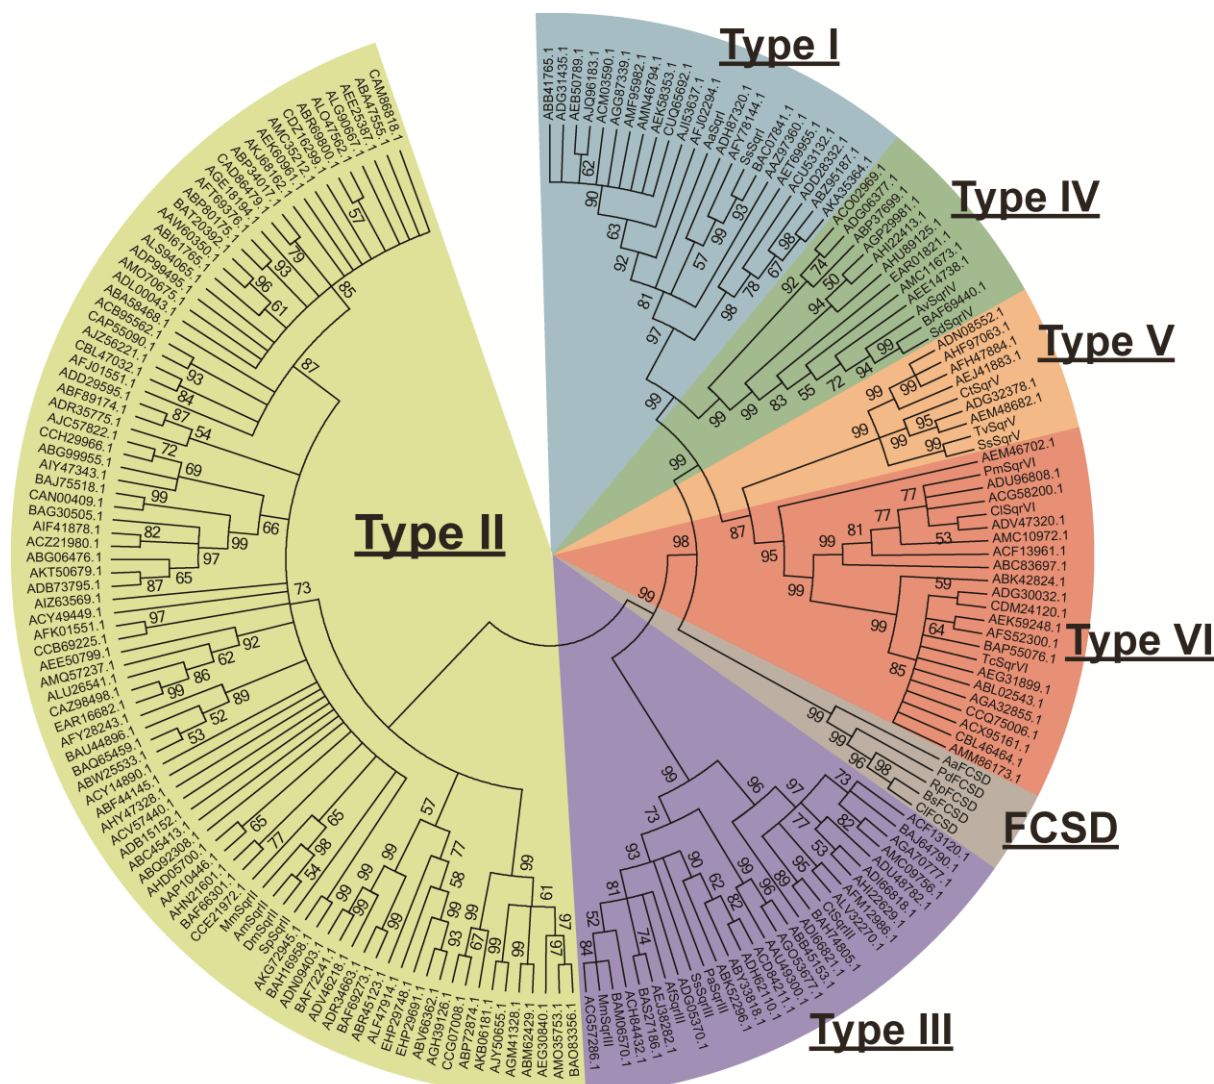

79  
 80 **Supplementary Figure S3. The phylogenetic tree of selected SQRs in sequenced**  
 81 **bacterial genomes from GenBank.** The representative 173 SQR sequences were used for  
 82 phylogenetic tree construction with reported seed sequences. These sequences were aligned  
 83 by using clustalW, and the tree was built by using MEGA6. Reference proteins are listed  
 84 below, with the organism origin and accession number: AaSqrI, *A. aeolicus* (NP\_214500.1 );  
 85 SsSqrI, *S. sp.* (NP\_942192.1 ); SpSqrII, *S. pombe* (NP\_596067.1 ); DmSqrII, *D.*  
 86 *melanogaster* (NP\_647877.1 ); AmSqrII, *A. marina* (ABV22505.1 ); MmSqrII, *M. musculus*  
 87 (EDL28115.1 ); AfSqrIII, *A. fulgidus* (NP\_069393.1 ); MmSqrIII, *M. magnetotacticum*  
 88 (ZP\_00055086.1 ); CtSqrIII, *C. tepidum* (NP\_661917.1 ); SsSqrIII, *S. solfataricus*  
 89 (NP\_343961.1 ); PaSqrIII, *P. aerophilum* (NP\_560139.1 ); SdSqrIV, *S. denitrificans*  
 90 (YP\_393133.1); AvSqrIV, *A. vinosum* (ZP\_04773162.1); CtSqrV, *C. tepidum*

91 (NP\_661769.1 ); TvSqrV, *T. volcanium* (NP\_111725.1 ); SsSqrV, *S. solfataricus*

92 (NP\_343636.1 ); TcSqrVI, *T. crunogena* (ABB41976.1 ); PmSqrVI, *P. marina*

93 (YP\_002730289.1 ); ClSqrVI, *C. luteolum* (YP\_375032.1 ).

94

95

96

97

98

99

100

101

102

103

104

105

106

107

108

109

110

111

112

113

114

115

116

117



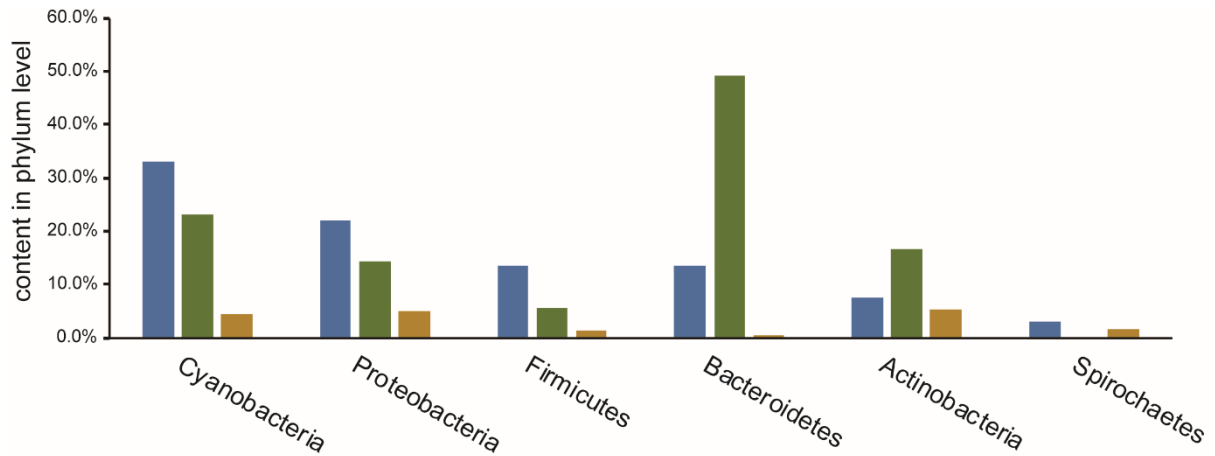

118

119 **Supplementary Figure S4. The relative abundance of strains encoding *pdo* and *sqr* at the**120 **phylum level.** The strains encoding *pdo* and *sqr*, only *pdo*, or only *sqr* were separately counted

121 at the phylum level. The relative abundances of them were calculated by dividing the total

122 number of strains in the same phylum. The blue, green and yellow columns represent the

123 relative abundance of strains encoding *pdo* and *sqr*, only *pdo*, or only *sqr*, respectively.

124

125

126

127

128

129

130

131

132

133

134

135

136

137

138



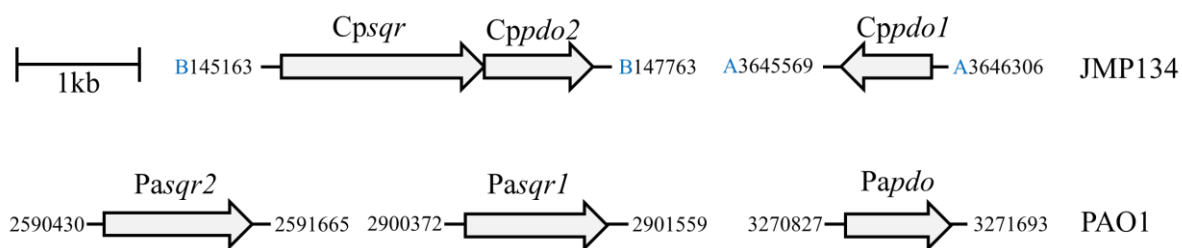

139  
140

141 **Supplementary Figure S5. Organization of the *sqr* and *pdo* genes in *C. pinatubonensis***

142 **JMP134 and *P. aeruginosa* PAO1.** The gene ID of *Cpsqr*, *Cppdo2* (also known as *CnsdoA*),  
143 *Cppdo1* (also known as *Cnethe1*), *Pasqr2*, *Pasqr1* and *Papdo* (also known as *PasdoA*) from  
144 NCBI were 3613170, 3613171, 3609713, 879884, 882794 and 882596, respectively. The  
145 numbers indicate the positions of putative genes in corresponding genome, and blue “A” and  
146 “B” denoted chromosome A and chromosome B in *C. pinatubonensis* JMP134.

147  
148  
149  
150  
151  
152  
153  
154  
155  
156  
157

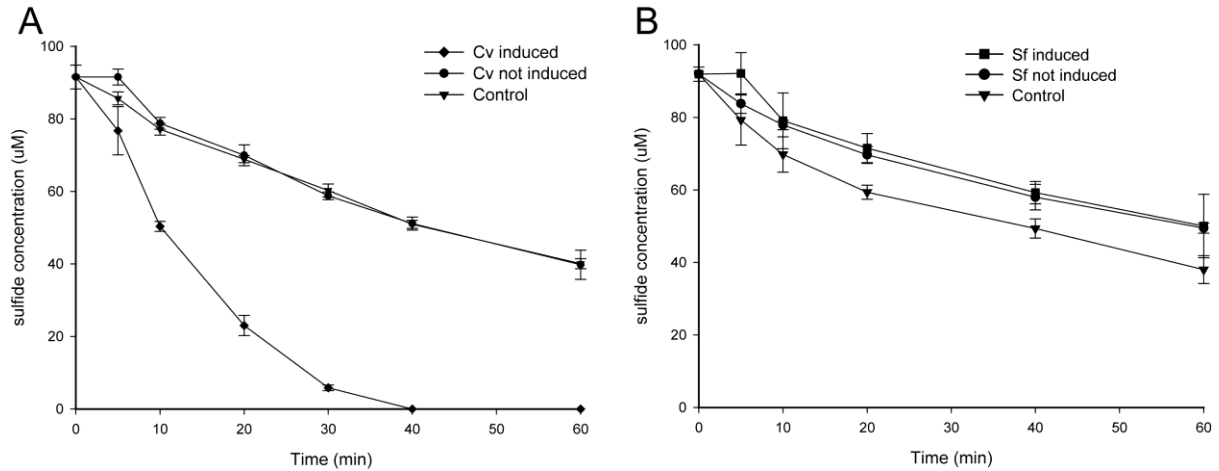

158

159

**Supplementary Figure S6. H<sub>2</sub>S oxidation by *C. vitaeruminis* DSM20294 and *S. fonticola***

160

**DSM4576.** Cells were suspended in 50 mM Tris buffer (pH 8.0) with 50 µM DTPA at

161

OD<sub>600nm</sub> of 1, and NaHS was added to initiate the reaction. Samples were taken at indicated

162

time points for sulfide detection. Controls were done in the same buffer without bacterial

163

cells. **A)** *C. vitaeruminis* DSM20294 (Cv); **B)** *S. fonticola* DSM4576 (Sf). Both induced and

164

non-induced cells were tested. For the induction, the cells were spiked with 200 µM NaHS

165

and cultured for 2 hours before harvesting. All data are average of three samples with

166

standard deviation (error bar).

167

168

169

170

171

172

173

174

175

176

177

178

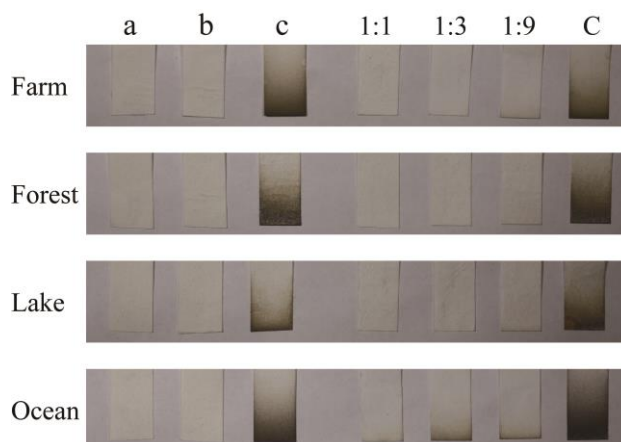

179

180 **Supplementary Figure S7. Testing H<sub>2</sub>S production with environmental samples and**  
181 **bacterial isolates.** Columns are labeled as follows: **a**, cultures inoculated with environmental  
182 samples; **b**, H<sub>2</sub>S-oxidizing isolates; **c**, H<sub>2</sub>S-non-oxidizing isolates; **1:1, 1:3, 1:9**, ratios of  
183 oxidizer and non-oxidizers in mixed cultures; and **C**, the non-oxidizer only as controls. The  
184 cultures in LB was incubated at 30°C for 24 h. According to 16S rRNA gene sequence, the  
185 selected H<sub>2</sub>S oxidizers were most similar to *Acinetobacter calcoaceticus* H3, *Pseudomonas*  
186 *moraviensis* IARI-HHS1-33, *Pseudomonas putida* S6, and *Marinomonas* species BSi20567;  
187 the non-oxidizers were most similar to *Arthrobacter oryzae* OS115, *Streptomyces gardneri*  
188 NBRC 12865 *Aeromonas sobria* JY081016-1, and *Pseudoalteromonas phenolica* AN40 from  
189 the farm, forest, lake, and seawater samples.

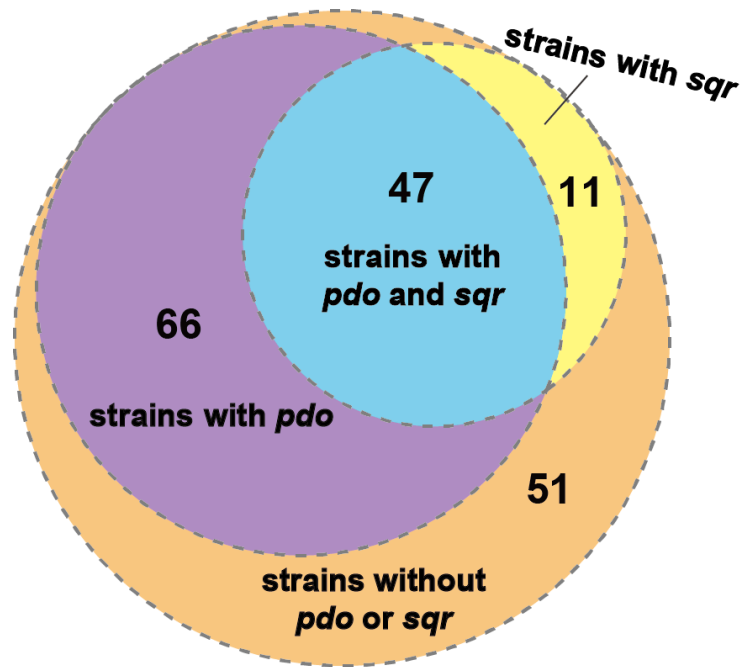

**177 marine strains**

190  
191

192 **Supplementary Figure S8. The distribution of PDOs and SQRs in sequenced marine**

193 **bacterial genomes.** The selected PDOs or SQRs from the marine bacterial genomes

194 downloaded from from the Gordon and Betty Moore Foundation Marine Microbial Genome

195 Sequencing project were listed with its related genome IDs to form a table. The genomes

196 containing PDO or SQR were separately summarized. Then the genomes containing both

197 PDO and SQR were combined with the genome IDs. The figure is drawn by using the

198 Venerable package in R language and modified with Adobe Illustrator CS6.

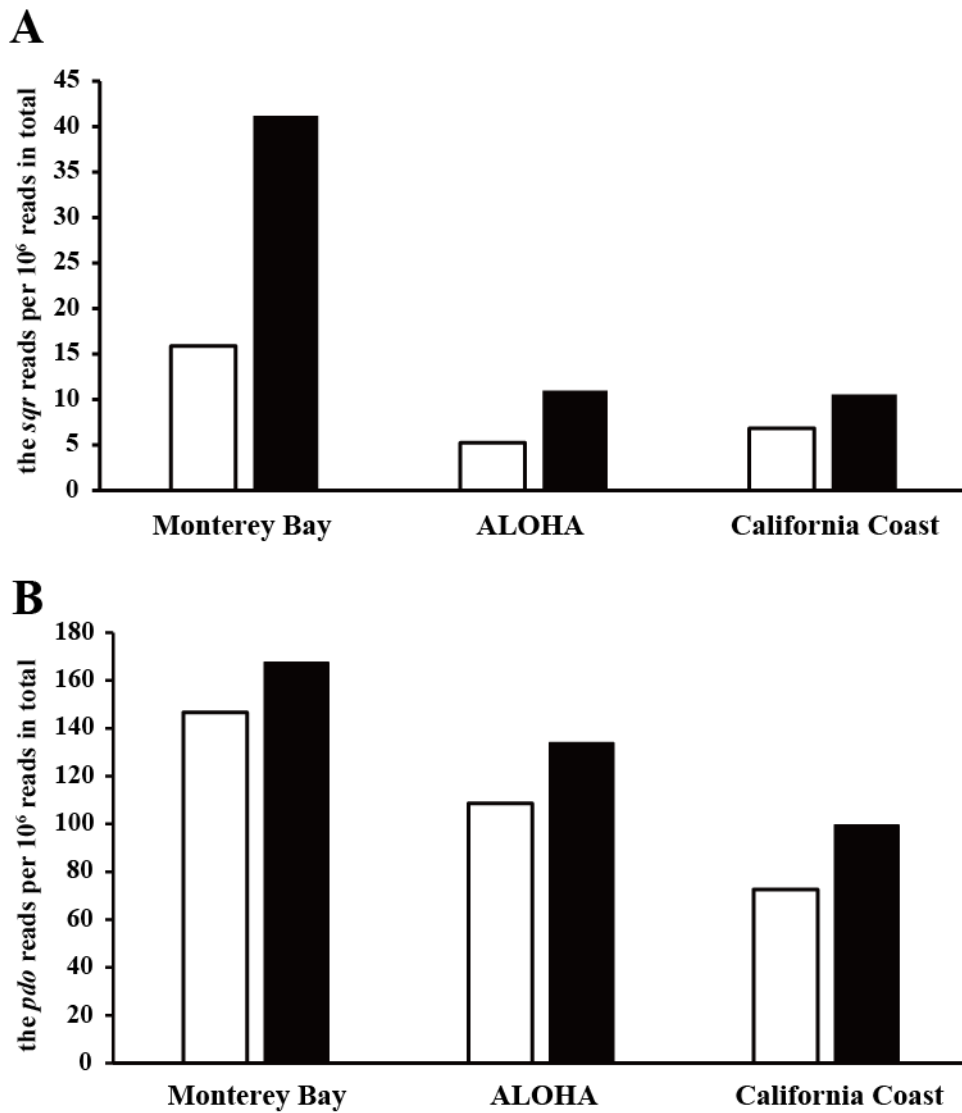

Supplementary Figure S9. The normalized transcripts of *sqr* and *pdo* per 1 000

000 total reads at different sampling sites. **A)** The transcripts for *sqr* at three different sampling sites; **B)** The transcripts for *pdo* at three different sampling sites.

The white column indicates the normalized transcripts occurring at day time, and the black column indicates the normalized transcripts occurring at night time.
