# Supplementary material for: Sulfide production and oxidation by heterotrophic bacteria under aerobic conditions
Source: PubMed Central journal article supplement — ISME J. 2017 Aug 4;11(12):2754–66. doi: 10.1038/ismej.2017.125 (PMC5702731; doi:10.1038/ismej.2017.125), 2017-08-04
Supplement: ismej2017125x4.pdf [file ismej2017125x4.pdf]

**Supplementary Table S1. The used bacteria and plasmids**

| Bacterium and plasmid                          | Genotype, property or sequence                                                                                                                 | Source or reference |
|------------------------------------------------|------------------------------------------------------------------------------------------------------------------------------------------------|---------------------|
| <b>Bacterial strains</b>                       |                                                                                                                                                |                     |
| <i>E. coli</i> BL21 (DE3)                      | F <sup>-</sup> ompT hsdS <sub>B</sub> (r <sub>B</sub> <sup>-</sup> m <sub>B</sub> <sup>-</sup> ) gal (λ1857 ind1 Sam7 nin5 lacUV5 T7gene1) dcm | Novagen             |
| Ec (Cp <i>pdo2</i> -C <i>psqr</i> )            | <i>E. coli</i> BL21(DE3)/pBBR1MCS-2::C <i>pdo2</i> -C <i>psqr</i>                                                                              | (Xin et al 2016)    |
| Ec (C <i>pdo2</i> )                            | <i>E. coli</i> BL21(DE3)/pBBR1MCS-2::C <i>pdo2</i>                                                                                             | This study          |
| Ec (C <i>psqr</i> )                            | <i>E. coli</i> BL21(DE3)/pBBR1MCS-2::C <i>psqr</i>                                                                                             | This study          |
| Ec(P <i>apdo</i> -P <i>asqr</i> <sub>2</sub> ) | <i>E. coli</i> BL21(DE3)/pBBR1MCS-5::P <i>apdo</i> -P <i>asqr</i> <sub>2</sub>                                                                 | This study          |
| Ec(Z <i>pdo</i> -P <i>asqr</i> <sub>2</sub> )  | <i>E. coli</i> BL21(DE3)/pBBR1MCS-5::Z <i>pdo</i> -P <i>asqr</i> <sub>2</sub>                                                                  | This study          |
| Ec(S <i>apdo</i> -P <i>asqr</i> <sub>2</sub> ) | <i>E. coli</i> BL21(DE3)/pBBR1MCS-5::S <i>apdo</i> -P <i>asqr</i> <sub>2</sub>                                                                 | This study          |
| Ec(B <i>cpdo</i> -P <i>asqr</i> <sub>2</sub> ) | <i>E. coli</i> BL21(DE3)/pBBR1MCS-5::B <i>cpdo</i> -P <i>asqr</i> <sub>2</sub>                                                                 | This study          |
| Ec(Z <i>pdo</i> )                              | <i>E. coli</i> BL21(DE3)/pBBR1MCS-5::Z <i>pdo</i>                                                                                              | This study          |
| Ec(S <i>apdo</i> )                             | <i>E. coli</i> BL21(DE3)/pBBR1MCS-5::S <i>apdo</i>                                                                                             | This study          |
| Ec(B <i>cpdo</i> )                             | <i>E. coli</i> BL21(DE3)/pBBR1MCS-5::B <i>cpdo</i>                                                                                             | This study          |
| Ec(P <i>asqr</i> <sub>2</sub> )                | <i>E. coli</i> BL21(DE3)/pBBR1MCS-5::P <i>asqr</i> <sub>2</sub>                                                                                | This study          |
| Ec(pMCS5)                                      | <i>E. coli</i> BL21(DE3)/pBBR1MCS-5                                                                                                            | This study          |
| <i>E. coli</i> HB101/pRK2013                   | For vector mobilization                                                                                                                        | (Zhang et al 2013)  |
| <i>Corynebacterium vitaeruminis</i> DSM20294   | Wild type, Cv as abbreviation                                                                                                                  | DSMZ                |
| <i>Cupriavidus pinatubonensis</i> JMP134       | Wild type, Cp as abbreviation                                                                                                                  | ATCC 23344          |
| <i>C. pinatubonensis</i> 2K                    | The <i>pdo2</i> and <i>sqr</i> mutant of <i>C. pinatubonensis</i> JMP134                                                                       | This study          |
| <i>Pseudomonas aeruginosa</i> PAO1             | Wild type, Pa as abbreviation                                                                                                                  | ATCC 15692          |
| <i>P. aeruginosa</i> 3K                        | The <i>pdo1</i> , <i>pdo2</i> and <i>sqr</i> mutant of <i>P. aeruginosa</i> PAO1                                                               | This study          |
| <i>Agrobacterium tumefaciens</i> C58           | Wild type, At as abbreviation                                                                                                                  | ATCC 33970          |
| <i>Bacillus cereus</i> ATCC 10876              | Wild type                                                                                                                                      | ATCC 10876          |
| <i>Bacillus subtilis</i> 168                   | Wild type, Bs as abbreviatoin                                                                                                                  | ATCC 23857          |

|                                                    |                                                                                                     |                       |
|----------------------------------------------------|-----------------------------------------------------------------------------------------------------|-----------------------|
| <i>Burkholderia cepacia</i> ATCC 25416             | Wild type                                                                                           | ATCC 25416            |
| <i>Corynebacterium glutamicum</i> RES167           | Wild type                                                                                           | (Tauch et al 2002)    |
| <i>Enterobacter cloacae</i>                        | Wild type                                                                                           | Yuzhen Zhang          |
| <i>Enterococcus faecalis</i> CMCC32223             | Wild type                                                                                           | ATCC 29212            |
| <i>Gluconobacter oxydans</i> 621H                  | Wild type                                                                                           | DSM 2343              |
| <i>Klebsiella pneumonia</i>                        | Wild type, Kp as abbreviation                                                                       | Yuzhen Zhang          |
| <i>Pseudomonas putida</i> S16                      | Wild type                                                                                           | ATCC BAA2546          |
| <i>Serratiamar cescens</i> ATCC13880               | Wild type                                                                                           | ATCC 13880            |
| <i>Sinorhizobium meliloti</i> 1021                 | Wild type                                                                                           | (Galibert et al 2001) |
| <i>Sphingobium chlorophenicum</i> L-1              | Wild type                                                                                           | ATCC 53874            |
| <i>Serratia fonticola</i> DSM 4576                 | Wild type, Sf as abbreviation                                                                       | DSMZ                  |
| <i>Staphylococcus aureus</i> ATCC 6538P            | Wild type                                                                                           | ATCC 6538P            |
| <i>Staphylococcus sciuri</i>                       | Wild type                                                                                           | Yuzhen Zhang          |
| <i>Streptomyces coelicolor</i> M145                | Wild type                                                                                           | ATCC BAA471           |
| <i>Streptomyces griseus</i>                        | Wild type                                                                                           | Yuzhen Zhang          |
| <i>Zunongwangia profunda</i> SM-A87                | Wild type                                                                                           | DSM 18752             |
| <i>Zymomonas mobilis</i> ATCC 31821                | Wild type                                                                                           | ATCC 31821            |
| <b>Plasmids</b>                                    |                                                                                                     |                       |
| pBBR1MCS-5                                         | Gm <sup>r</sup> , Plac                                                                              | (Kovach et al 1995)   |
| pBBR1MCS-2::Cp <sub>ppdo2</sub> -Cp <sub>sqr</sub> | Cp <sub>ppdo2</sub> and Cp <sub>sqr</sub> in pBBR1MCS-2                                             | (Xin et al 2016)      |
| pBBR1MCS-2::Cp <sub>ppdo2</sub>                    | Cp <sub>ppdo2</sub> in pBBR1MCS-2, modified from pBBR1MCS-2::Cp <sub>ppdo2</sub> -Cp <sub>sqr</sub> | This study            |
| pBBR1MCS-2::Cp <sub>sqr</sub>                      | Cp <sub>sqr</sub> in pBBR1MCS-2, modified from pBBR1MCS-2::Cp <sub>ppdo2</sub> -Cp <sub>sqr</sub>   | This study            |
| pBBR1MCS-5-Pap <sub>do</sub> -Pas <sub>qr2</sub> . | Pap <sub>do</sub> and Pas <sub>qr2</sub> in pBBR1MCS-5, control by IPTG induced lac promoter        | This study            |
| pBBR1MCS-5-Zp <sub>ppdo</sub> -Pas <sub>qr</sub>   | Zp <sub>ppdo</sub> and Pas <sub>qr2</sub> in pBBR1MCS-5, control by IPTG induced lac promoter       | This study            |
| pBBR1MCS-5-Sap <sub>do</sub> -Pas <sub>qr</sub>    | Sap <sub>do</sub> and Pas <sub>qr2</sub> in pBBR1MCS-5, control by IPTG induced lac promoter        | This study            |
| pBBR1MCS-5-Bcp <sub>do</sub> -Pas <sub>qr</sub>    | Bcp <sub>do</sub> and Pas <sub>qr2</sub> in pBBR1MCS-5, control by IPTG induced lac promoter        | This study            |

|                                |                                                              |            |
|--------------------------------|--------------------------------------------------------------|------------|
| pBBR1MCS-5::Zppdo              | Zppdo in pBBR1MCS-5, modified from pBBR1MCS-5::Zppdo-Pasqr2  | This study |
| pBBR1MCS-5::Sapdo              | Sapdo in pBBR1MCS-5, modified from pBBR1MCS-5::Sapdo-Pasqr2  | This study |
| pBBR1MCS-5::Bcpdo              | Bcpdo in pBBR1MCS-5, modified from pBBR1MCS-5::Bcpdo-Pasqr2  | This study |
| pBBR1MCS-5::Pasqr <sub>2</sub> | Pasqr2 in pBBR1MCS-5, modified from pBBR1MCS-5::Zppdo-Pasqr2 | This study |

---

## Reference

Galibert F, Finan TM, Long SR, Puhler A, Abola P, Ampe F *et al* (2001). The composite genome of the legume symbiont *Sinorhizobium meliloti*. *Science* **293**: 668-672.

Kovach ME, Elzer PH, Hill DS, Robertson GT, Farris MA, Roop RM, 2nd *et al* (1995). Four new derivatives of the broad-host-range cloning vector pBBR1MCS, carrying different antibiotic-resistance cassettes. *Gene* **166**: 175-176.

Tauch A, Kirchner O, Löffler B, Gotker S, Puhler A, Kalinowski J (2002). Efficient electrotransformation of *Corynebacterium diphtheriae* with a mini-replicon derived from the *Corynebacterium glutamicum* plasmid pGA1. *Curr Microbiol* **45**: 362-367.

Xin Y, Liu H, Cui F, Liu H, Xun L (2016). Recombinant *Escherichia coli* with sulfide: Quinone oxidoreductase and persulfide dioxygenase rapidly oxidizes sulfide to sulfite and thiosulfate via a new pathway. *Environmental microbiology*.

Zhang PY, Xu PP, Xia ZJ, Wang J, Xiong J, Li YZ (2013). Combined treatment with the antibiotics kanamycin and streptomycin promotes the conjugation of *Escherichia coli*. *FEMS microbiology letters* **348**: 149-156.
