# Supplementary material for: Sulfide production and oxidation by heterotrophic bacteria under aerobic conditions
Source: PubMed Central journal article supplement — ISME J. 2017 Aug 4;11(12):2754–66. doi: 10.1038/ismej.2017.125 (PMC5702731; doi:10.1038/ismej.2017.125), 2017-08-04
Supplement: ismej2017125x5.pdf [file ismej2017125x5.pdf]

**Supplementary Table S2. The designed primers**

| Primer |                                                    |
|--------|----------------------------------------------------|
| PaF1   | CACACAGGAAACAGCTATGTTGAAACCCGACATCACTGC            |
| PaR1   | TCAGAACAGATCCAGCGGGATC                             |
| PaF2   | CTGGATCTGTTCTGACCCACTCGGATCGTCGAAGGAAC             |
| PaR2   | TTCCATTCGCCATTCACGCCCCGGTCTAGCGCCCC                |
| Pm5F1  | TGAATGGCGAATGGAAATTGTAAG                           |
| Pm5R1  | AGCTGTTTCCTGTGTGAAATTGTTATC                        |
| Pm5F2  | AGCTGTTTCCTGTGTGAAATTGTTATCC                       |
| Pm5R2  | CCCACTCGGATCGTCGAAG                                |
| BcF1   | ATTTACACACAGGAAACAGCTATGGAGGGAATAGCTATGCTT         |
| BcR1   | CCTTCGACGATCCGAGTGGGTTACACATTGAGATTGCTTGTGTAT      |
| SaF1   | ATTTACACACAGGAAACAGCTATGTTTTTTAAACAGTTTTACGATA     |
| SaR1   | CCTTCGACGATCCGAGTGGGTTATTTTAATGATTCTGGAAAATCT      |
| ZpF1   | ATTTACACACAGGAAACAGCTATGAACATCAAACAATTTGAATAC      |
| ZpR1   | CCTTCGACGATCCGAGTGGGTTAATTTTTAAAATCGTTAATATCTTCACT |
| DsF1   | CGCCATTCACCCCTTCGACGATCCGAGTGGG                    |
| DsR1   | TCGTCGAAGGTGAATGGCGAATGGAAATTGTAAGC                |
| DpF1   | GGAAACAGCTCCCCTCGGATCGTCGAAG                       |
| DpR1   | TCCGAGTGGGAGCTGTTTCCTGTGTGAAATTGTTATCC             |
| DsF2   | TCGCCATTCAgtcgtctgttccttgggtcg                     |
| DsR2   | aacagacgacTGAATGGCGAATGGAAATTGTAAG                 |
| DpF2   | ggtcgggtggCCTGTGTGAAATTGTTATCCGCT                  |
| DpR2   | TTCACACAGGccaccgaccaaggaaca                        |
| Pu11   | ctatgacatgattacgaattGCACATTGCGCCGATGCAGCCG         |
| Pu12   | CCCCGCACGGGGAGGAGCCG                               |
| Pd11   | CGGCTCCTCCCCGTGCGGGGGACTTCTCCTTAACCCTGAGAAAGCC     |
| Pd12   | CCGGGTACCGAGCTCGAATTGGCGTAGAAGCGGATGCGC            |
| Pu21   | ctatgacatgattacgaattCTCTTCTGGCGTTTTGGAGATCTG       |
| Pu22   | ACCGGGCGGCAGCCCTCGG                                |
| Pd21   | GCCGAGGGCTGCCGCCCGGTGGGAGTTCCTTCGACGATCCG          |
| Pd22   | CCGGGTACCGAGCTCGAATTGAAGAGCATCACCGCGCGC            |
| Su1    | ctatgacatgattacgaattCCTGTTGCTGGGCAGCCTGG           |
| Su2    | GATCTGTTCTGATCAGCTGCGGC                            |
| Sd1    | GCAGCTGATCAGAACAGATCGGAGGTTTCCTTGCGCGGGC           |
| Sd2    | CCGGGTACCGAGCTCGAATTGACCGCTTCCGCCTGAACCGTG         |
