# Supplementary material for: Sulfide production and oxidation by heterotrophic bacteria under aerobic conditions
Source: PubMed Central journal article supplement — ISME J. 2017 Aug 4;11(12):2754–66. doi: 10.1038/ismej.2017.125 (PMC5702731; doi:10.1038/ismej.2017.125), 2017-08-04
Supplement: ismej2017125x6.pdf [file ismej2017125x6.pdf]

Supplementary Table S3. Types and phylum distribution of PDOs and SQRs of *pdo-sqr* gene clusters

| Phylum              | PDO types |         |          | SQR types |         |         |         | the counts of 4929 strains<br>in the phylum level |
|---------------------|-----------|---------|----------|-----------|---------|---------|---------|---------------------------------------------------|
|                     | type I    | type II | type III | type I    | type II | type IV | type VI |                                                   |
| Actinobacteria      | 0         | 0       | 21       | 0         | 21      | 0       | 0       | 531                                               |
| Bacteroidetes       | 0         | 0       | 3        | 0         | 2       | 1       | 0       | 185                                               |
| Chloroflexi         | 0         | 0       | 3        | 0         | 3       | 0       | 0       | 25                                                |
| Cyanobacteria       | 1         | 0       | 0        | 0         | 1       | 0       | 0       | 91                                                |
| Deinococcus-Thermus | 0         | 0       | 2        | 0         | 2       | 0       | 0       | 24                                                |
| Firmicutes          | 0         | 0       | 134      | 0         | 134     | 0       | 0       | 1086                                              |
| Planctomycetes      | 0         | 0       | 2        | 0         | 2       | 0       | 0       | 6                                                 |
| Proteobacteria      | 56        | 232     | 0        | 1         | 284     | 0       | 4       | 2504                                              |
