# Supplementary material for: Sulfide production and oxidation by heterotrophic bacteria under aerobic conditions
Source: PubMed Central journal article supplement — ISME J. 2017 Aug 4;11(12):2754–66. doi: 10.1038/ismej.2017.125 (PMC5702731; doi:10.1038/ismej.2017.125), 2017-08-04
Supplement: ismej2017125x7.pdf [file ismej2017125x7.pdf]

**Supplementary Table S4. The bacteria with adjacent *sqr* and *pdo* genes from GenBank**

| Strains                                   | Genome Ids | SQR      | SQR types | PDO      | PDO types | first batch* |
|-------------------------------------------|------------|----------|-----------|----------|-----------|--------------|
| Bacillus cereus 03BB102                   | CP001407   | ACO26823 | II        | ACO26974 | III       | No           |
|                                           |            | ACO26468 | II        | ACO31190 | III       | No           |
| Bacillus cereus 03BB102                   | CP009318   | AJG52892 | II        | AJG54117 | III       | No           |
|                                           |            | AJG54980 | II        | AJG55703 | III       | No           |
| Bacillus cereus 03BB108                   | CP009641   | AJI12952 | II        | AJI13187 | III       | No           |
|                                           |            | AJI10307 | II        | AJI09584 | III       | No           |
| Bacillus cereus F837/76                   | CP003187   | AEW55666 | II        | AEW55667 | III       | Yes          |
|                                           |            | AEW56314 | II        | AEW56313 | III       | Yes          |
| Burkholderia cenocepacia                  | CP011917   | ALV55629 | II        | ALV55628 | II        | Yes          |
|                                           |            | ALV57497 | II        | ALV57498 | II        | Yes          |
| Bacillus thuringiensis                    | CP009600   | AJH69161 | II        | AJH67770 | III       | No           |
|                                           |            | AJH67137 | II        | AJH71305 | III       | No           |
| Bacillus thuringiensis str. Al Hakam      | CP000485   | ABK85581 | II        | ABK85582 | III       | Yes          |
|                                           |            | ABK86182 | II        | ABK86181 | III       | Yes          |
| Cupriavidus metallidurans CH34            | CP000352   | ABF09250 | II        | ABF09249 | II        | Yes          |
|                                           |            | CP000353 | ABF12209  | II       | ADC45300  | II           |
| Mycobacterium chubuense NBB4              | CP003053   | AFM18110 | II        | AFM18109 | III       | Yes          |
|                                           |            | CP003054 | AFM20298  | II       | AFM20299  | III          |
| Mycobacterium vanbaalenii PYR-1           | CP000511   | ABM12653 | II        | ABM12652 | III       | Yes          |
|                                           |            | ABM14799 | II        | ABM14800 | III       | Yes          |
| Pseudomonas putida ND6                    | CP003588   | AFK67141 | II        | AFK67140 | II        | Yes          |
|                                           |            | AFK69513 | II        | AFK69512 | II        | Yes          |
| Staphylococcus aureus subsp. aureus ST228 | HE579061   | CCJ11992 | II        | CCJ11991 | III       | No           |
|                                           |            | HE579063 | CCJ13957  | II       | CCJ13956  | III          |
| Streptomyces sp. CdTB01                   | CP013743   | ALV38387 | II        | ALV31520 | III       | No           |
|                                           |            | ALV32260 | II        | ALV32261 | III       | Yes          |
| Burkholderia cenocepacia H111             | HG938370   | CDN60258 | II        | CDN60257 | II        | Yes          |
|                                           |            | CDN60259 | II        |          | II        | Yes          |

|                                           |          |          |    |          |   |     |
|-------------------------------------------|----------|----------|----|----------|---|-----|
| Acidithiobacillus caldus SM-1             | CP002573 | AEK59248 | VI | AEK59246 | I | Yes |
| Acidithiobacillus ferrooxidans ATCC 53993 | CP001132 | ACH82698 | VI | ACH82700 | I | Yes |
| Acinetobacter baumannii                   | AP014649 | BAP66727 | II | BAP66728 | I | Yes |
| Acinetobacter baumannii                   | CP007535 | AIA51787 | II | AIA51788 | I | Yes |
| Acinetobacter baumannii                   | CP008706 | AKA31851 | II | AKA31852 | I | Yes |
| Acinetobacter baumannii                   | CP009256 | AIL75603 | II | AIL75602 | I | Yes |
| Acinetobacter baumannii                   | CP009257 | AIL80701 | II | AIL80700 | I | Yes |
| Acinetobacter baumannii                   | CP009534 | AIS06446 | II | AIS06445 | I | Yes |
| Acinetobacter baumannii                   | CP010397 | AJB66950 | II | AJB66951 | I | Yes |
| Acinetobacter baumannii                   | CP010779 | AKJ45814 | II | AKJ45815 | I | Yes |
| Acinetobacter baumannii                   | CP010781 | AJF81747 | II | AJF81746 | I | Yes |
| Acinetobacter baumannii                   | CP012004 | AKQ26932 | II | AKQ26933 | I | Yes |
| Acinetobacter baumannii                   | CP012006 | AKQ30647 | II | AKQ30648 | I | Yes |
| Acinetobacter baumannii                   | CP012952 | ALJ87936 | II | ALJ87937 | I | Yes |
| Acinetobacter baumannii                   | CP013924 | ALX99599 | II | ALX99600 | I | Yes |
| Acinetobacter baumannii                   | CP014215 | AMC15402 | II | AMC15401 | I | Yes |
| Acinetobacter baumannii                   | CP014528 | AMN01507 | II | AMN01506 | I | Yes |
| Acinetobacter baumannii                   | CP014538 | AML63693 | II | AML63694 | I | Yes |
| Acinetobacter baumannii                   | CP014539 | AML67180 | II | AML67181 | I | Yes |
| Acinetobacter baumannii                   | CP014540 | AML70860 | II | AML70861 | I | Yes |
| Acinetobacter baumannii                   | CP014541 | AML74417 | II | AML74418 | I | Yes |
| Acinetobacter baumannii                   | LN865143 | CRL94455 | II | CRL94454 | I | Yes |
| Acinetobacter baumannii                   | LN868200 | CRX64777 | II | CRX64778 | I | Yes |
| Acinetobacter baumannii                   | LN997846 | CUW35137 | II | CUW35136 | I | Yes |
| Acinetobacter baumannii 1656-2            | CP001921 | ADX03837 | II | ADX03836 | I | Yes |
| Acinetobacter baumannii AB0057            | CP001182 | ACJ41312 | II | ACJ41311 | I | Yes |
| Acinetobacter baumannii AC30              | CP007577 | AHX64508 | II | AHX64507 | I | Yes |
| Acinetobacter baumannii ACICU             | CP000863 | ACC57056 | II | ACC57055 | I | Yes |
| Acinetobacter baumannii ATCC 17978        | CP000521 | ABO12136 | II | ABO12135 | I | Yes |
| Acinetobacter baumannii AYE               | CU459141 | CAM86818 | II | CAM86819 | I | Yes |
| Acinetobacter baumannii BJAB07104         | CP003846 | AGQ14375 | II | AGQ14376 | I | Yes |
| Acinetobacter baumannii BJAB0715          | CP003847 | AGQ06574 | II | AGQ06573 | I | Yes |

|                                                                             |          |          |    |          |     |     |
|-----------------------------------------------------------------------------|----------|----------|----|----------|-----|-----|
| <i>Acinetobacter baumannii</i> BJAB0868                                     | CP003849 | AGQ10416 | II | AGQ10415 | I   | Yes |
| <i>Acinetobacter baumannii</i> D1279779                                     | CP003967 | AGH35586 | II | AGH35585 | I   | Yes |
| <i>Acinetobacter baumannii</i> LAC-4                                        | CP007712 | AIY37910 | II | AIY37909 | I   | Yes |
| <i>Acinetobacter baumannii</i> MDR-TJ                                       | CP003500 | AFI95567 | II | AFI95568 | I   | Yes |
| <i>Acinetobacter baumannii</i> MDR-ZJ06                                     | CP001937 | AEP06369 | II | AEP06368 | I   | Yes |
| <i>Acinetobacter baumannii</i> NCGM 237                                     | AP013357 | BAN87727 | II | BAN87728 | I   | Yes |
| <i>Acinetobacter baumannii</i> TCDC-AB0715                                  | CP002522 | ADX92386 | II | ADX92385 | I   | Yes |
| <i>Acinetobacter baumannii</i> TYTH-1                                       | CP003856 | AFU38187 | II | AFU38186 | I   | Yes |
| <i>Acinetobacter baumannii</i> ZW85-1                                       | CP006768 | AHB91462 | II | AHB91463 | I   | Yes |
| <i>Acinetobacter nosocomialis</i>                                           | CP010368 | AJB48327 | II | AJB48328 | I   | Yes |
| <i>Acinetobacter oleivorans</i> DR1                                         | CP002080 | ADI90932 | II | ADI90933 | I   | Yes |
| <i>Acinetobacter pittii</i>                                                 | CP014477 | AMM29506 | II | AMM29505 | I   | Yes |
| <i>Acinetobacter</i> sp. DUT-2                                              | CP014651 | AMO40770 | II | AMO40771 | I   | Yes |
| <i>Alcanivorax borkumensis</i> SK2                                          | AM286690 | CAL17390 | II | CAL17389 | II  | Yes |
| <i>Alcanivorax dieselolei</i> B5                                            | CP003466 | AFT69376 | II | AFT69377 | II  | Yes |
| <i>Alcanivorax</i> sp. NBRC 101098                                          | AP014613 | BAP14856 | II | BAP14855 | II  | Yes |
| <i>Alicyclobacillus acidocaldarius</i> subsp. <i>acidocaldarius</i> DSM 446 | CP001727 | ACV57440 | II | ACV57442 | III | Yes |
| <i>Alteromonas macleodii</i> str. 'Balearic Sea AD45'                       | CP003873 | AFT93568 | II | AFT93567 | II  | Yes |
| <i>Alteromonas mediterranea</i>                                             | CP013928 | AMJ76882 | II | AMJ76881 | II  | Yes |
| <i>Alteromonas mediterranea</i>                                             | CP013930 | AMJ81027 | II | AMJ81026 | II  | Yes |
| <i>Alteromonas mediterranea</i> 615                                         | CP004846 | AGP76509 | II | AGP76508 | II  | Yes |
| <i>Alteromonas mediterranea</i> DE                                          | CP001103 | AEA96234 | II | AEA96233 | II  | Yes |
| <i>Alteromonas mediterranea</i> DE1                                         | CP003917 | AFV83616 | II | AFV83615 | II  | Yes |
| <i>Alteromonas mediterranea</i> MED64                                       | CP004848 | AGP80079 | II | AGP80078 | II  | Yes |
| <i>Alteromonas mediterranea</i> U7                                          | CP004851 | AGP87980 | II | AGP87979 | II  | Yes |
| <i>Alteromonas mediterranea</i> U8                                          | CP004852 | AGP91834 | II | AGP91833 | II  | Yes |
| <i>Alteromonas mediterranea</i> UM4b                                        | CP004855 | AGP99960 | II | AGP99959 | II  | Yes |
| <i>Alteromonas mediterranea</i> UM7                                         | CP004853 | AGP95630 | II | AGP95629 | II  | Yes |
| <i>Archangium gephyra</i>                                                   | CP011509 | AKI99197 | II | AKI99195 | I   | Yes |
| <i>Asaia bogorensis</i> NBRC 16594                                          | AP014690 | BAT20392 | II | BAT20393 | II  | Yes |
| <i>Azotobacter chroococcum</i> NCIMB 8003                                   | CP010415 | AJE19978 | II | AJE19979 | II  | Yes |
| <i>Bacillus amyloliquefaciens</i> CC178                                     | CP006845 | AGZ56737 | II | AGZ56736 | III | Yes |

|                                                        |          |          |    |          |     |     |
|--------------------------------------------------------|----------|----------|----|----------|-----|-----|
| Bacillus amyloliquefaciens subsp. plantarum str. FZB42 | CP000560 | ABS74338 | II | ABS74337 | III | Yes |
| Bacillus anthracis                                     | CP008853 | AIM06352 | II | AIM06353 | III | Yes |
| Bacillus anthracis                                     | CP008854 | AIM11784 | II | AIM11785 | III | Yes |
| Bacillus anthracis                                     | CP010792 | AJF90102 | II | AJF90103 | III | Yes |
| Bacillus anthracis                                     | CP010852 | AJM81016 | II | AJM81017 | III | Yes |
| Bacillus anthracis                                     | CP014179 | AMC04486 | II | AMC04487 | III | Yes |
| Bacillus anthracis str. A16                            | CP001970 | AHE89831 | II | AHE89832 | III | Yes |
| Bacillus anthracis str. Ames                           | AE016879 | AAP26391 | II | AAP26392 | III | Yes |
| Bacillus anthracis str. 'Ames Ancestor'                | AE017334 | AAT31651 | II | AAT31652 | III | Yes |
| Bacillus anthracis str. H9401                          | CP002091 | AFH83800 | II | AFH83801 | III | Yes |
| Bacillus anthracis str. Sterne                         | AE017225 | AAT54672 | II | AAT54673 | III | Yes |
| Bacillus bombysepticus str. Wang                       | CP007512 | AHX19530 | II | AHX19529 | III | Yes |
| Bacillus cereus                                        | CP009686 | AKE17831 | II | AKE17830 | III | Yes |
| Bacillus cereus                                        | CP011145 | ALZ60711 | II | ALZ60712 | III | Yes |
| Bacillus cereus ATCC 14579                             | AE016877 | AAP10446 | II | AAP10445 | III | Yes |
| Bacillus cereus biovar anthracis str. CI               | CP001746 | ADK05147 | II | ADK05148 | III | Yes |
| Bacillus cereus E33L                                   | CP000001 | AAU17982 | II | AAU17981 | III | Yes |
| Bacillus cereus FRI-35                                 | CP003747 | AFQ12314 | II | AFQ12313 | III | Yes |
| Bacillus licheniformis                                 | CP014781 | AMR11295 | II | AMR11294 | III | Yes |
| Bacillus licheniformis DSM 13 = ATCC 14580             | AE017333 | AAU41657 | II | AAU41656 | III | Yes |
| Bacillus licheniformis DSM 13 = ATCC 14580             | CP000002 | AAU24294 | II | AAU24293 | III | Yes |
| Bacillus paralicheniformis                             | CP010524 | AJO19195 | II | AJO19194 | III | Yes |
| Bacillus paralicheniformis ATCC 9945a                  | CP005965 | AGN37231 | II | AGN37230 | III | Yes |
| Bacillus subtilis subsp. spizizenii TU-B-10            | CP002905 | AEP87484 | II | AEP87483 | III | Yes |
| Bacillus thuringiensis                                 | CP011349 | AKJ61376 | II | AKJ61377 | III | Yes |
| Bacillus thuringiensis                                 | CP012100 | AKR12538 | II | AKR12539 | III | Yes |
| Bacillus thuringiensis                                 | CP013000 | ALL23988 | II | ALL23989 | III | Yes |
| Bacillus thuringiensis                                 | CP013055 | ALL58640 | II | ALL58641 | III | Yes |
| Bacillus thuringiensis                                 | CP013274 | ALQ68121 | II | ALQ68122 | III | Yes |
| Bacillus thuringiensis                                 | CP014283 | AMR06056 | II | AMR06055 | III | Yes |
| Bacillus thuringiensis BMB171                          | CP001903 | ADH07995 | II | ADH07994 | III | Yes |
| Bacillus thuringiensis HD-771                          | CP003752 | AFQ13914 | II | AFQ13915 | III | Yes |

|                                                                        |          |          |    |          |     |     |
|------------------------------------------------------------------------|----------|----------|----|----------|-----|-----|
| <i>Bacillus thuringiensis</i> HD-789                                   | CP003763 | AFQ27142 | II | AFQ27141 | III | Yes |
| <i>Bacillus thuringiensis</i> MC28                                     | CP003694 | AFU17785 | II | AFU17786 | III | Yes |
| <i>Bacillus thuringiensis</i> serovar <i>galleriae</i>                 | CP010089 | AJA20713 | II | AJA20712 | III | Yes |
| <i>Bacillus thuringiensis</i> serovar <i>indiana</i>                   | CP010106 | AKR36452 | II | AKR36451 | III | Yes |
| <i>Bacillus thuringiensis</i> serovar <i>kurstaki</i> str. HD-1        | CP004870 | AIE34757 | II | AIE34756 | III | Yes |
| <i>Bacillus thuringiensis</i> serovar <i>kurstaki</i> str. HD73        | CP004069 | AGE79335 | II | AGE79334 | III | Yes |
| <i>Bacillus thuringiensis</i> serovar <i>kurstaki</i> str. YBT-1520    | CP004858 | AHZ52332 | II | AHZ52331 | III | Yes |
| <i>Bacillus thuringiensis</i> serovar <i>kurstaki</i> str. YBT-1520    | CP007607 | AIM30892 | II | AIM30893 | III | Yes |
| <i>Bacillus thuringiensis</i> serovar <i>thuringiensis</i> str. IS5056 | CP004137 | AGG05420 | II | AGG05421 | III | Yes |
| <i>Bacillus thuringiensis</i> serovar <i>tolworthi</i>                 | AP014864 | BAR83253 | II | BAR83254 | III | Yes |
| <i>Bacillus velezensis</i>                                             | CP009679 | AIU82138 | II | AIU82137 | III | Yes |
| <i>Bacillus velezensis</i>                                             | CP011346 | AKF30870 | II | AKF30869 | III | Yes |
| <i>Bacillus velezensis</i> NAU-B3                                      | HG514499 | CDH95540 | II | CDH95541 | III | Yes |
| <i>Bacillus weihenstephanensis</i>                                     | CP009746 | AIW85125 | II | AIW85124 | III | Yes |
| <i>Bacillus weihenstephanensis</i> KBAB4                               | CP000903 | ABY43552 | II | ABY43553 | III | Yes |
| <i>Brevibacillus laterosporus</i> LMG 15441                            | CP007806 | AIG28390 | II | AIG28391 | III | Yes |
| <i>Brevundimonas</i> sp. DS20                                          | CP012897 | ALJ07225 | II | ALJ07222 | II  | Yes |
| <i>Burkholderia ambifaria</i> AMMD                                     | CP000440 | ABI87227 | II | ABI87226 | II  | Yes |
| <i>Burkholderia ambifaria</i> MC40-6                                   | CP001025 | ACB64154 | II | ACB64153 | II  | Yes |
| <i>Burkholderia cenocepacia</i> AU 1054                                | CP000380 | ABF81196 | II | ABF81197 | II  | Yes |
| <i>Burkholderia cenocepacia</i> HI2424                                 | CP000458 | ABK08497 | II | ABK08496 | II  | Yes |
| <i>Burkholderia cenocepacia</i> J2315                                  | AM747720 | CAR52119 | II | CAR52118 | II  | Yes |
| <i>Burkholderia cenocepacia</i> MC0-3                                  | CP000958 | ACA90930 | II | ACA90929 | II  | Yes |
| <i>Burkholderia cepacia</i>                                            | CP011301 | AKE03609 | II | AKE03610 | II  | Yes |
| <i>Burkholderia cepacia</i> ATCC 25416                                 | CP012981 | ALK18752 | II | ALK18751 | II  | Yes |
| <i>Burkholderia cepacia</i> GG4                                        | CP003774 | AFQ48092 | II | AFQ48093 | II  | Yes |
| <i>Burkholderia contaminans</i>                                        | CP009743 | AKM40940 | II | AKM40941 | II  | Yes |
| <i>Burkholderia gladioli</i> BSR3                                      | CP002599 | AEA60868 | II | AEA60867 | II  | Yes |
| <i>Burkholderia glumae</i> BGR1                                        | CP001503 | ACR28753 | II | ACR28754 | II  | Yes |
| <i>Burkholderia glumae</i> PG1                                         | CP002580 | AJK46667 | II | AJK46666 | II  | Yes |
| <i>Burkholderia lata</i>                                               | CP000151 | ABB08638 | II | ABB08637 | II  | Yes |
| <i>Burkholderia multivorans</i> ATCC 17616                             | AP009385 | BAG43648 | II | BAG43647 | II  | Yes |

|                                            |          |          |    |          |     |     |
|--------------------------------------------|----------|----------|----|----------|-----|-----|
| <i>Burkholderia multivorans</i> ATCC 17616 | CP000868 | ABX15202 | II | ABX15203 | II  | Yes |
| <i>Burkholderia plantarii</i>              | CP007212 | ALK30791 | II | ALK30790 | II  | Yes |
| <i>Burkholderia pseudomallei</i>           | CP010973 | AJW53325 | II | AJW53324 | II  | Yes |
| <i>Burkholderia pseudomallei</i>           | CP012041 | ALJ70345 | II | ALJ70344 | II  | Yes |
| <i>Burkholderia pseudomallei</i>           | CP012515 | ALB93920 | II | ALB93919 | II  | Yes |
| <i>Burkholderia pseudomallei</i>           | CP012517 | ALB99989 | II | ALB99988 | II  | Yes |
| <i>Burkholderia pseudomallei</i>           | CP012576 | ALC57124 | II | ALC57125 | II  | Yes |
| <i>Burkholderia pseudomallei</i>           | LK936442 | CDU28558 | II | CDU28557 | II  | Yes |
| <i>Burkholderia pseudomallei</i> 1026b     | CP002833 | AFI66134 | II | AFI66135 | II  | Yes |
| <i>Burkholderia pseudomallei</i> BPC006    | CP003781 | AFR16089 | II | AFR16088 | II  | Yes |
| <i>Burkholderia pseudomallei</i> K96243    | BX571965 | CAH35561 | II | CAH35562 | II  | Yes |
| <i>Burkholderia pyrrocinia</i>             | CP011503 | AKM01359 | II | AKM01358 | II  | Yes |
| <i>Burkholderia</i> sp. Bp5365             | CP013380 | ALX42505 | II | ALX42506 | II  | Yes |
| <i>Burkholderia</i> sp. KJ006              | CP003514 | AFJ85913 | II | AFJ85912 | II  | Yes |
| <i>Burkholderia vietnamiensis</i> G4       | CP000614 | ABO54693 | II | ABO54692 | II  | Yes |
| <i>Chloroflexus aurantiacus</i> J-10-fl    | CP000909 | ABY37071 | II | ABY37073 | III | Yes |
| <i>Chloroflexus</i> sp. Y-400-fl           | CP001364 | ACM55565 | II | ACM55567 | III | Yes |
| <i>Cupriavidus basilensis</i>              | CP010537 | AJG24654 | II | AJG24655 | II  | Yes |
| <i>Emticicia oligotrophica</i> DSM 17448   | CP002961 | AFK01551 | II | AFK01550 | III | Yes |
| <i>Geobacillus kaustophilus</i> HTA426     | BA000043 | BAD76375 | II | BAD76373 | III | Yes |
| <i>Geobacillus</i> sp. C56-T3              | CP002050 | ADI26444 | II | ADI26446 | III | Yes |
| <i>Geobacillus</i> sp. JS12                | CP014749 | AMQ20869 | II | AMQ20867 | III | Yes |
| <i>Geobacillus</i> sp. Y412MC52            | CP002442 | ADU94456 | II | ADU94454 | III | Yes |
| <i>Geobacillus</i> sp. Y412MC61            | CP001794 | ACX79488 | II | ACX79486 | III | Yes |
| <i>Geobacillus stearothermophilus</i> 10   | CP008934 | ALA71645 | II | ALA71647 | III | Yes |
| <i>Glaciecola nitratreducens</i> FR1064    | CP003060 | AEP29452 | I  | AEP29454 | II  | Yes |
| <i>Glaciecola</i> sp. 4H-3-7+YE-5          | CP002527 | AEE25387 | II | AEE25386 | II  | Yes |
| <i>Gluconobacter oxydans</i> 621H          | CP000009 | AAW60350 | II | AAW60351 | II  | Yes |
| <i>Gluconobacter oxydans</i> DSM 3504      | CP004373 | AHK70580 | II | AHK70581 | II  | Yes |
| <i>Gluconobacter oxydans</i> H24           | CP003926 | AFW00206 | II | AFW00207 | II  | Yes |
| <i>Granulibacter bethesdensis</i> CGDNIH1  | CP000394 | ABI61765 | II | ABI61764 | II  | Yes |
| <i>Granulibacter bethesdensis</i> CGDNIH2  | CP003183 | AHJ69411 | II | AHJ69413 | II  | Yes |



|                                               |          |          |    |          |     |     |
|-----------------------------------------------|----------|----------|----|----------|-----|-----|
| Granulibacter bethesdensis CGDNIH3            | CP003181 | AHJ62691 | II | AHJ62690 | II  | Yes |
| Granulibacter bethesdensis CGDNIH4            | CP003182 | AHJ66745 | II | AHJ66747 | II  | Yes |
| Halothiobacillus neapolitanus c2              | CP001801 | ACX95161 | VI | ACX95160 | I   | Yes |
| Herbaspirillum rubrisubalbicans M1            | CP013737 | ALU89685 | II | ALU89683 | II  | Yes |
| Hyphomicrobium sp. MC1                        | FQ859181 | CCB63325 | II | CCB63324 | II  | Yes |
| Komagataeibacter medellinensis NBRC 3288      | AP012159 | BAK83735 | II | BAK83734 | II  | Yes |
| Komagataeibacter xylinus E25                  | CP004360 | AHI26509 | II | AHI26508 | II  | Yes |
| Labrenzia sp. CP4                             | CP011927 | AMN55403 | II | AMN55402 | II  | Yes |
| Lutibacter sp. LP1                            | CP013355 | AMC11673 | IV | AMC11670 | III | Yes |
| Marinobacter hydrocarbonoclasticus ATCC 49840 | FO203363 | CCG93840 | II | CCG93841 | II  | Yes |
| Marinobacter hydrocarbonoclasticus VT8        | CP000514 | ABM17483 | II | ABM17484 | II  | Yes |
| Marinomonas sp. MWYL1                         | CP000749 | ABR69800 | II | ABR69801 | II  | Yes |
| Meiothermus ruber DSM 1279                    | CP001743 | ADD29595 | II | ADD29596 | III | Yes |
| Methylobacillus flagellatus KT                | CP000284 | ABE50080 | II | ABE50081 | I   | Yes |
| Methyloceanibacter caenitepidi                | AP014648 | BAQ16742 | II | BAQ16741 | II  | Yes |
| Mycobacterium fortuitum                       | CP011269 | ALI27752 | II | ALI27751 | III | Yes |
| Mycobacterium gilvum PYR-GCK                  | CP000656 | ABP43469 | II | ABP43468 | III | Yes |
| Mycobacterium gilvum Spyr1                    | CP002385 | ADU01731 | II | ADU01732 | III | Yes |
| Mycobacterium neoaurum VKM Ac-1815D           | CP006936 | AHC24477 | II | AHC24478 | III | Yes |
| Mycobacterium phlei                           | CP014475 | AMO62305 | II | AMO62304 | III | Yes |
| Mycobacterium rhodesiae NBB3                  | CP003169 | AEV74651 | II | AEV74650 | III | Yes |
| Mycobacterium sp. EPa45                       | CP011773 | AKK25570 | II | AKK25569 | III | Yes |
| Mycobacterium sp. JLS                         | CP000580 | ABO01454 | II | ABO01455 | III | Yes |
| Mycobacterium sp. KMS                         | CP000518 | ABL94586 | II | ABL94587 | III | Yes |
| Mycobacterium sp. MCS                         | CP000384 | ABG11412 | II | ABG11413 | III | Yes |
| Mycobacterium sp. NRRL B-3805                 | CP011022 | AMO05067 | II | AMO05068 | III | Yes |
| Mycobacterium sp. VKM Ac-1817D                | CP009914 | AIY47343 | II | AIY47342 | III | Yes |
| Myxococcus fulvus 124B02                      | CP006003 | AKF79095 | II | AKF79093 | I   | Yes |
| Myxococcus fulvus HW-1                        | CP002830 | AEI63480 | II | AEI63482 | I   | Yes |
| Myxococcus hansupus                           | CP012109 | AKQ69903 | II | AKQ69905 | I   | Yes |
| Nitrobacter hamburgensis X14                  | CP000319 | ABE61803 | II | ABE61802 | II  | Yes |
| Nitrobacter winogradskyi Nb-255               | CP000115 | ABA04153 | II | ABA04154 | II  | Yes |

|                                                         |          |          |    |          |     |     |
|---------------------------------------------------------|----------|----------|----|----------|-----|-----|
| Nitrosococcus oceani ATCC 19707                         | CP000127 | ABA58468 | II | ABA58469 | I   | Yes |
| Nitrosococcus watsonii C-113                            | CP002086 | ADJ28667 | II | ADJ28668 | I   | Yes |
| Novosphingobium sp. PP1Y                                | FR856862 | CCA91153 | II | CCA91156 | II  | Yes |
| Octadecabacter temperatus                               | CP012160 | AKS47216 | II | AKS47214 | II  | Yes |
| Paenibacillus larvae subsp. larvae DSM 25430            | CP003355 | AHD05700 | II | AHD05699 | III | Yes |
| Paraburkholderia caribensis                             | CP013104 | ALP67166 | II | ALP67165 | II  | Yes |
| Paraburkholderia phymatum STM815                        | CP001045 | ACC75280 | II | ACC75281 | II  | Yes |
| Paraburkholderia xenovorans LB400                       | CP000271 | ABE35279 | II | ABE35278 | II  | Yes |
| Pasteurella multocida 36950                             | CP003022 | AET16602 | II | AET16604 | II  | Yes |
| Pasteurella multocida OH1905                            | CP004392 | AKD40424 | II | AKD40426 | II  | Yes |
| Pasteurella multocida subsp. multocida OH4807           | CP004391 | AKD39042 | II | AKD39044 | II  | Yes |
| Pasteurella multocida subsp. multocida PMTB2.1          | CP007205 | AMM82477 | II | AMM82479 | II  | Yes |
| Pasteurella multocida subsp. multocida str. 3480        | CP001409 | AFI46907 | II | AFI46909 | II  | Yes |
| Pasteurella multocida subsp. multocida str. HB03        | CP003328 | AHE65101 | II | AHE65103 | II  | Yes |
| Pasteurella multocida subsp. multocida str. HN06        | CP003313 | AFF24970 | II | AFF24972 | II  | Yes |
| Pasteurella multocida subsp. multocida str. Pm70        | AE004439 | AAK03561 | II | AAK03563 | II  | Yes |
| Pirellula staleyii DSM 6068                             | CP001848 | ADB15152 | II | ADB15150 | III | Yes |
| Pseudohongiella spirulinae                              | CP013189 | ALO47562 | II | ALO47561 | II  | Yes |
| Pseudomonas alkylphenolia                               | CP009048 | AIL59279 | II | AIL59278 | II  | Yes |
| Pseudomonas brassicacearum                              | CP007410 | AHL34455 | II | AHL34454 | II  | Yes |
| Pseudomonas brassicacearum                              | CP012680 | ALQ03330 | II | ALQ03331 | II  | Yes |
| Pseudomonas brassicacearum subsp. brassicacearum NFM421 | CP002585 | AEA68791 | II | AEA68792 | II  | Yes |
| Pseudomonas chlororaphis                                | CP008696 | AIC19534 | II | AIC19535 | II  | Yes |
| Pseudomonas chlororaphis                                | CP011110 | AKA25088 | II | AKA25087 | II  | Yes |
| Pseudomonas chlororaphis                                | CP014867 | AMS17443 | II | AMS17444 | II  | Yes |
| Pseudomonas chlororaphis subsp. aurantiaca              | CP009290 | AIS13507 | II | AIS13506 | II  | Yes |
| Pseudomonas citronellolis                               | CP014158 | AMO77168 | II | AMO77167 | II  | Yes |
| Pseudomonas entomophila L48                             | CT573326 | CAK13004 | II | CAK13003 | II  | Yes |
| Pseudomonas fluorescens                                 | CP008896 | AIG04687 | II | AIG04686 | II  | Yes |
| Pseudomonas fluorescens                                 | CP012830 | ALI04038 | II | ALI04039 | II  | Yes |
| Pseudomonas fluorescens F113                            | CP003150 | AEV63093 | II | AEV63094 | II  | Yes |
| Pseudomonas fluorescens NCIMB 11764                     | CP010945 | AKV08462 | II | AKV08463 | II  | Yes |



|                                       |          |          |    |          |    |     |
|---------------------------------------|----------|----------|----|----------|----|-----|
| <i>Pseudomonas knackmussii</i> B13    | HG322950 | CDF85541 | II | CDF85540 | II | Yes |
| <i>Pseudomonas mandelii</i> JR-1      | CP005960 | AHZ68054 | II | AHZ68055 | II | Yes |
| <i>Pseudomonas monteilii</i> SB3078   | CP006978 | AHC85339 | II | AHC85338 | II | Yes |
| <i>Pseudomonas monteilii</i> SB3101   | CP006979 | AHC90707 | II | AHC90706 | II | Yes |
| <i>Pseudomonas mosselii</i> SJ10      | CP009365 | AIN61182 | II | AIN61181 | II | Yes |
| <i>Pseudomonas parafulva</i>          | CP009747 | AIZ34918 | II | AIZ34919 | II | Yes |
| <i>Pseudomonas plecoglossicida</i>    | CP010359 | AJG16646 | II | AJG16645 | II | Yes |
| <i>Pseudomonas protegens</i> Cab57    | AP014522 | BAO61956 | II | BAO61957 | II | Yes |
| <i>Pseudomonas protegens</i> CHA0     | CP003190 | AGL84399 | II | AGL84400 | II | Yes |
| <i>Pseudomonas protegens</i> Pf-5     | CP000076 | AAY91837 | II | AAY91838 | II | Yes |
| <i>Pseudomonas putida</i>             | CP007620 | AHZ74555 | II | AHZ74554 | II | Yes |
| <i>Pseudomonas putida</i>             | CP014343 | AMK28644 | II | AMK28643 | II | Yes |
| <i>Pseudomonas putida</i> BIRD-1      | CP002290 | ADR57791 | II | ADR57790 | II | Yes |
| <i>Pseudomonas putida</i> DOT-T1E     | CP003734 | AFO46736 | II | AFO46735 | II | Yes |
| <i>Pseudomonas putida</i> F1          | CP000712 | ABQ76244 | II | ABQ76243 | II | Yes |
| <i>Pseudomonas putida</i> GB-1        | CP000926 | ABY95985 | II | ABY95984 | II | Yes |
| <i>Pseudomonas putida</i> H8234       | CP005976 | AGN81230 | II | AGN81229 | II | Yes |
| <i>Pseudomonas putida</i> HB3267      | CP003738 | AGA71037 | II | AGA71036 | II | Yes |
| <i>Pseudomonas putida</i> KT2440      | AE015451 | AAN65687 | II | AAN65686 | II | Yes |
| <i>Pseudomonas putida</i> NBRC 14164  | AP013070 | BAN51898 | II | BAN51897 | II | Yes |
| <i>Pseudomonas putida</i> S12         | CP009974 | AJA13492 | II | AJA13493 | II | Yes |
| <i>Pseudomonas putida</i> S13.1.2     | CP010979 | AJQ49776 | II | AJQ49777 | II | Yes |
| <i>Pseudomonas putida</i> S16         | CP002870 | AEJ10605 | II | AEJ10604 | II | Yes |
| <i>Pseudomonas putida</i> W619        | CP000949 | ACA70578 | II | ACA70577 | II | Yes |
| <i>Pseudomonas</i> sp. CCOS 191       | LN847264 | CRI54545 | II | CRI54544 | II | Yes |
| <i>Pseudomonas</i> sp. FGI182         | CP007012 | AHD12177 | II | AHD12176 | II | Yes |
| <i>Pseudomonas</i> sp. MRSN12121      | CP010892 | AJO78082 | II | AJO78083 | II | Yes |
| <i>Pseudomonas</i> sp. Os17           | AP014627 | BAQ74263 | II | BAQ74264 | II | Yes |
| <i>Pseudomonas</i> sp. St29           | AP014628 | BAQ80562 | II | BAQ80563 | II | Yes |
| <i>Pseudomonas</i> sp. TKP            | CP006852 | AHC36802 | II | AHC36801 | II | Yes |
| <i>Pseudomonas</i> sp. URMO17WK12:I11 | LN854573 | CRL52279 | II | CRL52280 | II | Yes |
| <i>Pseudomonas</i> sp. URMO17WK12:I11 | LN865164 | CRN06103 | II | CRN06104 | II | Yes |

|                                                              |          |          |    |          |     |     |
|--------------------------------------------------------------|----------|----------|----|----------|-----|-----|
| <i>Pseudomonas</i> sp. VLB120                                | CP003961 | AGZ32883 | II | AGZ32882 | II  | Yes |
| <i>Pseudomonas stutzeri</i>                                  | CP002881 | AEJ05731 | II | AEJ05730 | II  | Yes |
| <i>Pseudomonas stutzeri</i>                                  | CP007509 | AHY42511 | II | AHY42512 | II  | Yes |
| <i>Pseudomonas stutzeri</i>                                  | CP011854 | AKN26557 | II | AKN26558 | II  | Yes |
| <i>Pseudomonas stutzeri</i> A1501                            | CP000304 | ABP80175 | II | ABP80174 | II  | Yes |
| <i>Pseudomonas stutzeri</i> CCUG 29243                       | CP003677 | AFM33909 | II | AFM33908 | II  | Yes |
| <i>Pseudomonas stutzeri</i> DSM 4166                         | CP002622 | AEA84512 | II | AEA84511 | II  | Yes |
| <i>Pseudomonas stutzeri</i> RCH2                             | CP003071 | AGA86335 | II | AGA86336 | II  | Yes |
| <i>Pseudomonas syringae</i> CC1557                           | CP007014 | AHG38780 | II | AHG38779 | II  | Yes |
| <i>Pseudomonas syringae</i> pv. <i>actinidiae</i> ICMP 18884 | CP011972 | AKT28026 | II | AKT28025 | II  | Yes |
| <i>Pseudomonas syringae</i> pv. <i>lapsa</i>                 | CP013183 | ALU58394 | II | ALU58393 | II  | Yes |
| <i>Pseudomonas syringae</i> pv. <i>syringae</i> B301D        | CP005969 | AKF43640 | II | AKF43639 | II  | Yes |
| <i>Pseudomonas syringae</i> pv. <i>syringae</i> B728a        | CP000075 | AAV35153 | II | AAV35152 | II  | Yes |
| <i>Pseudomonas syringae</i> pv. <i>syringae</i> HS191        | CP006256 | AKF48935 | II | AKF48934 | II  | Yes |
| <i>Pseudomonas syringae</i> pv. <i>tomato</i> str. DC3000    | AE016853 | AAO53663 | II | AAO53664 | II  | Yes |
| <i>Pseudomonas syringae</i> UMAF0158                         | CP005970 | ALD98423 | II | ALD98422 | II  | Yes |
| <i>Ralstonia eutropha</i> JMP134                             | CP000091 | AAZ62946 | II | AAZ62947 | II  | Yes |
| <i>Rivularia</i> sp. PCC 7116                                | CP003549 | AFY54319 | II | AFY54320 | I   | Yes |
| <i>Roseibacterium elongatum</i> DSM 19469                    | CP004372 | AHM04687 | II | AHM04688 | II  | Yes |
| <i>Roseiflexus</i> sp. RS-1                                  | CP000686 | ABQ92308 | II | ABQ92307 | III | Yes |
| <i>Roseobacter denitrificans</i> OCh 114                     | CP000362 | ABG30463 | II | ABG30464 | II  | Yes |
| <i>Roseobacter litoralis</i> OCh 149                         | CP002623 | AEI94087 | II | AEI94089 | II  | Yes |
| <i>Rubinisphaera brasiliensis</i> DSM 5305                   | CP002546 | ADY60095 | II | ADY60093 | III | Yes |
| <i>Salinispora arenicola</i> CNS-205                         | CP000850 | ABV98717 | II | ABV98718 | III | Yes |
| <i>Salinispora tropica</i> CNB-440                           | CP000667 | ABP54420 | II | ABP54419 | III | Yes |
| <i>Sphingopyxis fribergensis</i>                             | CP009122 | AJA09123 | II | AJA09120 | II  | Yes |
| <i>Sphingopyxis granuli</i>                                  | CP012199 | AMG72510 | II | AMG72509 | II  | Yes |
| <i>Sphingopyxis</i> sp. 113P3                                | CP009452 | ALC14225 | II | ALC14226 | II  | Yes |
| <i>Sphingorhabdus</i> sp. M41                                | CP014545 | AMO70675 | II | AMO70678 | II  | Yes |
| <i>Spongiibacter</i> sp. IMCC21906                           | CP011477 | AKH68051 | II | AKH68050 | II  | Yes |
| <i>Staphylococcus aureus</i>                                 | AP014942 | BAS50240 | II | BAS50239 | III | Yes |
| <i>Staphylococcus aureus</i>                                 | AP017320 | BAU33668 | II | BAU33667 | III | Yes |

|                                           |          |          |    |          |     |     |
|-------------------------------------------|----------|----------|----|----------|-----|-----|
| Staphylococcus aureus                     | CP010890 | ALD79627 | II | ALD79626 | III | Yes |
| Staphylococcus aureus                     | CP012593 | ALC93031 | II | ALC93030 | III | Yes |
| Staphylococcus aureus                     | CP013137 | ALO32817 | II | ALO32816 | III | Yes |
| Staphylococcus aureus                     | CP014064 | AMG42487 | II | AMG42486 | III | Yes |
| Staphylococcus aureus RF122               | AJ938182 | CAI79720 | II | CAI79719 | III | Yes |
| Staphylococcus aureus subsp. aureus       | CP012756 | ALH98175 | II | ALH98174 | III | Yes |
| Staphylococcus aureus subsp. aureus ED133 | CP001996 | ADI96582 | II | ADI96581 | III | Yes |
| Starkeya novella DSM 506                  | CP002026 | ADH88309 | II | ADH88308 | II  | Yes |
| Stigmatella aurantiaca DW4/3-1            | CP002271 | ADO75254 | II | ADO75256 | I   | Yes |
| Truepera radiovictrix DSM 17093           | CP002049 | ADI14366 | II | ADI14365 | III | Yes |
| Zunongwangia profunda SM-A87              | CP001650 | ADF52138 | II | ADF52140 | III | Yes |
| Acidithiobacillus ferrooxidans ATCC 23270 | CP001219 | ACK80058 | VI | ACK79351 | I   | No  |
| Acinetobacter baumannii AB307-0294        | CP001172 | ACJ59308 | II | ACJ57939 | I   | No  |
| Bacillus anthracis                        | CP007618 | AIK30821 | II | AIK33886 | III | No  |
| Bacillus anthracis                        | CP009325 | AJG66736 | II | AJG65100 | III | No  |
| Bacillus anthracis                        | CP009328 | AJG85244 | II | AJG83917 | III | No  |
| Bacillus anthracis                        | CP009331 | AJG69762 | II | AJG69973 | III | No  |
| Bacillus anthracis                        | CP009341 | AJG88595 | II | AJG86174 | III | No  |
| Bacillus anthracis                        | CP009464 | AJH27448 | II | AJH28496 | III | No  |
| Bacillus anthracis                        | CP009476 | AJH32337 | II | AJH36893 | III | No  |
| Bacillus anthracis                        | CP009544 | AJH52667 | II | AJH50583 | III | No  |
| Bacillus anthracis                        | CP009697 | AJH40507 | II | AJH40972 | III | No  |
| Bacillus anthracis                        | CP009700 | AJH59524 | II | AJH57498 | III | No  |
| Bacillus anthracis                        | CP009902 | AJH89568 | II | AJH87313 | III | No  |
| Bacillus anthracis                        | CP009981 | AJH96042 | II | AJH94445 | III | No  |
| Bacillus anthracis                        | CP010322 | AJI38370 | II | AJI38843 | III | No  |
| Bacillus anthracis str. A0248             | CP001598 | ACQ46350 | II | ACQ48342 | III | No  |
| Bacillus anthracis str. CDC 684           | CP001215 | ACP16297 | II | ACP17081 | III | No  |
| Bacillus anthracis str. Sterne            | CP009541 | AJH45563 | II | AJH47135 | III | No  |
| Bacillus anthracis str. Turkey32          | CP009315 | AJG46750 | II | AJG49390 | III | No  |
| Bacillus anthracis str. V770-NP-1R        | CP009598 | AJH98567 | II | AJH97473 | III | No  |
| Bacillus anthracis str. Vollum            | CP007666 | AIK63166 | II | AIK62793 | III | No  |

|                                                     |          |          |    |          |     |    |
|-----------------------------------------------------|----------|----------|----|----------|-----|----|
| Bacillus cereus                                     | CP009596 | AJH64406 | II | AJH64577 | III | No |
| Bacillus cereus                                     | CP009605 | AJK37200 | II | AJK35243 | III | No |
| Bacillus cereus AH820                               | CP001283 | ACK90827 | II | ACK91054 | III | No |
| Bacillus cereus ATCC 4342                           | CP009628 | AJH75840 | II | AJH75740 | III | No |
| Bacillus cereus B4264                               | CP001176 | ACK61046 | II | ACK61058 | III | No |
| Bacillus cereus E33L                                | CP009968 | AJI29308 | II | AJI28643 | III | No |
| Bacillus cereus G9842                               | CP001186 | ACK98325 | II | ACK94744 | III | No |
| Bacillus mycooides                                  | CP009692 | AJH17677 | II | AJH20286 | III | No |
| Bacillus simplex                                    | CP011008 | AMM95375 | II | AMM91879 | III | No |
| Bacillus thuringiensis                              | CP009335 | AJG75521 | II | AJG75045 | III | No |
| Bacillus thuringiensis                              | CP009720 | AJH84140 | II | AJH81288 | III | No |
| Bacillus thuringiensis                              | CP010088 | AJI36625 | II | AJI33691 | III | No |
| Bacillus thuringiensis HD1002                       | CP009351 | AJH07400 | II | AJH07457 | III | No |
| Bacillus thuringiensis serovar konkukian str. 97-27 | AE017355 | AAT61898 | II | AAT61441 | III | No |
| Burkholderia ambifaria AMMD                         | CP009798 | AJY23421 | II | AJY22559 | II  | No |
| Burkholderia cenocepacia                            | CP007781 | AIO42796 | II | AIO41555 | II  | No |
| Burkholderia cenocepacia                            | CP007783 | AIO33726 | II | AIO32130 | II  | No |
| Burkholderia cepacia                                | CP007787 | AIO48113 | II | AIO49866 | II  | No |
| Burkholderia cepacia JBK9                           | CP013730 | ALX11825 | II | ALX13332 | II  | No |
| Burkholderia dolosa AU0158                          | CP009795 | AJY13457 | II | AJY13238 | II  | No |
| Burkholderia gladioli                               | CP009323 | AJX00557 | II | AJW97857 | II  | No |
| Burkholderia glumae LMG 2196 = ATCC 33617           | CP009435 | AJY67854 | II | AJY67425 | II  | No |
| Burkholderia multivorans                            | CP008730 | AIO76740 | II | AIO77422 | II  | No |
| Burkholderia multivorans ATCC BAA-247               | CP009832 | AJY18170 | II | AJY20259 | II  | No |
| Burkholderia oklahomensis                           | CP008726 | AIO67752 | II | AIO66076 | II  | No |
| Burkholderia oklahomensis C6786                     | CP009555 | AJX32489 | II | AJX32671 | II  | No |
| Burkholderia pseudomallei                           | CP008758 | AIO89913 | II | AIO90354 | II  | No |
| Burkholderia pseudomallei                           | CP008780 | AIP04659 | II | AIP05092 | II  | No |
| Burkholderia pseudomallei                           | CP008781 | AIO12516 | II | AIO12843 | II  | No |
| Burkholderia pseudomallei                           | CP008834 | AIP13381 | II | AIP14225 | II  | No |
| Burkholderia pseudomallei                           | CP009128 | AIP71509 | II | AIP71688 | II  | No |
| Burkholderia pseudomallei                           | CP009157 | AIV79007 | II | AIV78062 | II  | No |

|                                         |          |          |    |          |    |    |
|-----------------------------------------|----------|----------|----|----------|----|----|
| Burkholderia pseudomallei               | CP009209 | AIP80805 | II | AIP81466 | II | No |
| Burkholderia pseudomallei               | CP009545 | AJX86741 | II | AJX87496 | II | No |
| Burkholderia pseudomallei               | CP009585 | AJX38860 | II | AJX37140 | II | No |
| Burkholderia pseudomallei 1026b         | CP004379 | AJX09475 | II | AJX09349 | II | No |
| Burkholderia pseudomallei 1106a         | CP000572 | ABN92011 | II | ABN91551 | II | No |
| Burkholderia pseudomallei 406e          | CP009298 | AJW91583 | II | AJW92141 | II | No |
| Burkholderia pseudomallei 576           | CP008777 | AIO97593 | II | AIO97032 | II | No |
| Burkholderia pseudomallei 668           | CP000570 | ABN85009 | II | ABN82641 | II | No |
| Burkholderia pseudomallei 7894          | CP009535 | AJX81139 | II | AJX80500 | II | No |
| Burkholderia pseudomallei A79A          | CP009165 | AIV96359 | II | AIV97964 | II | No |
| Burkholderia pseudomallei B03           | CP009151 | AIV90659 | II | AIV90671 | II | No |
| Burkholderia pseudomallei HBPUB10134a   | CP008911 | AIP53131 | II | AIP50144 | II | No |
| Burkholderia pseudomallei HBPUB10303a   | CP008894 | AIP58765 | II | AIP58236 | II | No |
| Burkholderia pseudomallei K42           | CP009162 | AIV63394 | II | AIV62748 | II | No |
| Burkholderia pseudomallei K96243        | CP009538 | AJX26913 | II | AJX28864 | II | No |
| Burkholderia pseudomallei MSHR146       | CP004042 | AHG66898 | II | AHG68247 | II | No |
| Burkholderia pseudomallei MSHR2543      | CP009478 | AJX75902 | II | AJX78340 | II | No |
| Burkholderia pseudomallei MSHR305       | CP006470 | AGR71081 | II | AGR70496 | II | No |
| Burkholderia pseudomallei MSHR491       | CP009485 | AJX21602 | II | AJX24002 | II | No |
| Burkholderia pseudomallei MSHR511       | CP004023 | AHG34364 | II | AHG35224 | II | No |
| Burkholderia pseudomallei MSHR520       | CP004368 | AHK67164 | II | AHK66020 | II | No |
| Burkholderia pseudomallei MSHR5848      | CP008909 | AIP40728 | II | AIP41317 | II | No |
| Burkholderia pseudomallei MSHR5855      | CP008784 | AIP21382 | II | AIP20926 | II | No |
| Burkholderia pseudomallei MSHR5858      | CP008892 | AIP49115 | II | AIP47683 | II | No |
| Burkholderia pseudomallei MSHR62        | CP009235 | AIV73016 | II | AIV71841 | II | No |
| Burkholderia pseudomallei MSHR840       | CP009474 | AJX70274 | II | AJX70638 | II | No |
| Burkholderia pseudomallei NAU20B-16     | CP004003 | AHE32556 | II | AHE31986 | II | No |
| Burkholderia pseudomallei NAU35A-3      | CP004377 | AIS88806 | II | AIS87165 | II | No |
| Burkholderia pseudomallei NCTC 13178    | CP004001 | AHE28000 | II | AHE28085 | II | No |
| Burkholderia pseudomallei NCTC 13179    | CP003976 | AGZ28927 | II | AGZ27877 | II | No |
| Burkholderia pseudomallei Pasteur 52237 | CP009899 | AJX61835 | II | AJX59178 | II | No |
| Burkholderia pseudomallei PB08298010    | CP009551 | AJX97326 | II | AJX96801 | II | No |

|                                                             |          |          |    |          |     |    |
|-------------------------------------------------------------|----------|----------|----|----------|-----|----|
| <i>Burkholderia pseudomallei</i> TSV 48                     | CP009161 | AIV46573 | II | AIV47854 | II  | No |
| <i>Burkholderia</i> sp. 2002721687                          | CP009549 | AJY42299 | II | AJY41891 | II  | No |
| <i>Burkholderia thailandensis</i>                           | CP008914 | AIP64538 | II | AIP63064 | II  | No |
| <i>Burkholderia thailandensis</i> 2002721643                | CP009601 | AJY00189 | II | AJX97484 | II  | No |
| <i>Burkholderia thailandensis</i> 2002721723                | CP004097 | AHI72393 | II | AHI73953 | II  | No |
| <i>Burkholderia thailandensis</i> 34                        | CP010017 | AJY28435 | II | AJY27405 | II  | No |
| <i>Burkholderia thailandensis</i> E254                      | CP004381 | AIT20610 | II | AIT22380 | II  | No |
| <i>Burkholderia thailandensis</i> E264                      | CP000086 | ABC37566 | II | ABC39027 | II  | No |
| <i>Burkholderia thailandensis</i> E444                      | CP004117 | AHI77389 | II | AHI79333 | II  | No |
| <i>Burkholderia thailandensis</i> H0587                     | CP004089 | AHI64790 | II | AHI64880 | II  | No |
| <i>Burkholderia thailandensis</i> MSMB121                   | CP004095 | AGK48637 | II | AGK47454 | II  | No |
| <i>Burkholderia thailandensis</i> MSMB59                    | CP004385 | AIS93957 | II | AIS95277 | II  | No |
| <i>Burkholderia thailandensis</i> USAMRU Malaysia #20       | CP004383 | AIC87887 | II | AIC86240 | II  | No |
| <i>Burkholderia ubonensis</i> MSMB22                        | CP009488 | AJX17889 | II | AJX15564 | II  | No |
| <i>Burkholderia vietnamiensis</i> LMG 10929                 | CP009631 | AJY07055 | II | AJY05940 | II  | No |
| <i>Croceicoccus naphthovorans</i>                           | CP011770 | AKM10652 | II | AKM11820 | II  | No |
| <i>Lysinibacillus varians</i>                               | CP006837 | AHN21601 | II | AHN21602 | III | No |
| <i>Paenarthrobacter aurescens</i> TC1                       | CP000476 | ABM10729 | II | ABM10812 | III | No |
| <i>Paraburkholderia fungorum</i>                            | CP010025 | AJZ56765 | II | AJZ56705 | II  | No |
| <i>Paraburkholderia xenovorans</i> LB400                    | CP008762 | AIP35447 | II | AIP36658 | II  | No |
| <i>Pasteurella multocida</i>                                | CP008918 | AIN48829 | II | AIN48805 | II  | No |
| <i>Pseudomonas monteilii</i>                                | CP013997 | AMA47886 | II | AMA46367 | II  | No |
| <i>Pseudomonas savastanoi</i> pv. <i>phaseolicola</i> 1448A | CP000058 | AAZ35149 | II | AAZ33023 | II  | No |
| <i>Staphylococcus aureus</i>                                | CP007539 | AHW66427 | II | AHW65826 | III | No |
| <i>Staphylococcus aureus</i>                                | CP007657 | ALK40591 | II | ALK40590 | III | No |
| <i>Staphylococcus aureus</i>                                | CP011147 | AKA98231 | II | AKA98230 | III | No |
| <i>Staphylococcus aureus</i>                                | LN831049 | CKH05136 | II | CKH05181 | III | No |
| <i>Staphylococcus aureus</i> 04-02981                       | CP001844 | ADC36300 | II | ADC36299 | III | No |
| <i>Staphylococcus aureus</i> subsp. <i>aureus</i> ECT-R 2   | FR714927 | CBX33449 | II | CBX33448 | III | No |
| <i>Staphylococcus aureus</i> subsp. <i>aureus</i> ED98      | CP001781 | ACY09985 | II | ACY09984 | III | No |
| <i>Staphylococcus aureus</i> subsp. <i>aureus</i> MSSA476   | BX571857 | CAG41826 | II | CAG41825 | III | No |
| <i>Staphylococcus aureus</i> subsp. <i>aureus</i> Mu3       | AP009324 | BAF76970 | II | BAF76969 | III | No |



|                                                  |          |          |    |          |     |    |
|--------------------------------------------------|----------|----------|----|----------|-----|----|
| Staphylococcus aureus subsp. aureus Mu50         | BA000017 | BAB56250 | II | BAB56249 | III | No |
| Staphylococcus aureus subsp. aureus MW2          | BA000033 | BAB93923 | II | BAB93922 | III | No |
| Staphylococcus aureus subsp. aureus N315         | BA000018 | BAB41303 | II | BAB41302 | III | No |
| Staphylococcus aureus subsp. aureus ST228        | HE579059 | CCJ10028 | II | CCJ10027 | III | No |
| Staphylococcus aureus subsp. aureus ST228        | HE579065 | CCJ25747 | II | CCJ25746 | III | No |
| Staphylococcus aureus subsp. aureus ST228        | HE579067 | CCJ17886 | II | CCJ17885 | III | No |
| Staphylococcus aureus subsp. aureus ST228        | HE579069 | CCJ19849 | II | CCJ19848 | III | No |
| Staphylococcus aureus subsp. aureus ST228        | HE579071 | CCJ21813 | II | CCJ21812 | III | No |
| Staphylococcus aureus subsp. aureus ST228        | HE579073 | CCJ23781 | II | CCJ23780 | III | No |
| Staphylococcus aureus subsp. aureus ST772-MRSA-V | CP010526 | AJE63516 | II | AJE63515 | III | No |
| Staphylococcus aureus subsp. aureus str. Newman  | AP009351 | BAF66301 | II | BAF66300 | III | No |

Note:

The green color represents the strains that carry two physically linked pdo-sqr.

The yellow color represents the strains that have one pdo gene and two sqr genes that are physically linked.

The blue color represents the stains that encode one copy of physically linked pdo-sqr.

\* 'Yes' means this pair of PDO and SQR was found in the first batch of searching; 'No' means it was not.
