# Supplementary material for: Sulfide production and oxidation by heterotrophic bacteria under aerobic conditions
Source: PubMed Central journal article supplement — ISME J. 2017 Aug 4;11(12):2754–66. doi: 10.1038/ismej.2017.125 (PMC5702731; doi:10.1038/ismej.2017.125), 2017-08-04
Supplement: ismej2017125x9.pdf [file ismej2017125x9.pdf]

**Supplementary Table S6. Environmental samples contained H<sub>2</sub>S oxidizers and non-oxidizers**

| Sample | cfu per mL or gram of sample          | % of H <sub>2</sub> S-oxidizers |
|--------|---------------------------------------|---------------------------------|
| Farm   | $1.2 \times 10^6 \pm 4.2 \times 10^5$ | $38\% \pm 10\%$                 |
| Forest | $4.5 \times 10^5 \pm 8.7 \times 10^4$ | $35\% \pm 7\%$                  |
| Lake   | $260 \pm 43$                          | $27\% \pm 3\%$                  |
| Ocean  | $1.3 \times 10^5 \pm 4.0 \times 10^4$ | $44\% \pm 14\%$                 |

LB agar plates were used to obtain colonies, and LB agar plates with 2% of NaCl and 10 mM MgSO<sub>4</sub> were used to culture marine bacteria. Colony forming units (cfu) are averages of at least three samples with standard deviations.
