# Supplementary material for: Sulfide production and oxidation by heterotrophic bacteria under aerobic conditions
Source: PubMed Central journal article supplement — ISME J. 2017 Aug 4;11(12):2754–66. doi: 10.1038/ismej.2017.125 (PMC5702731; doi:10.1038/ismej.2017.125), 2017-08-04
Supplement: ismej2017125x10.pdf [file ismej2017125x10.pdf]

Supplementary Table S7. The distribution of *sqr* and *pdo* at the order level in Bacteria

| <b>order</b>                    | <b>strain counts</b> | <b>counts of<br/>sqr<br/>sequences</b> | <b>counts of<br/>strains with<br/>sqr</b> | <b>counts of<br/>pdo sequences</b> | <b>counts of<br/>strains with<br/>pdo</b> |
|---------------------------------|----------------------|----------------------------------------|-------------------------------------------|------------------------------------|-------------------------------------------|
| Rhodobacterales (MRC)           | 40                   | 19                                     | 16                                        | 65                                 | 40                                        |
| Alteromonadales                 | 14                   | 1                                      | 1                                         | 6                                  | 5                                         |
| Flavobacteriales                | 11                   | 7                                      | 4                                         | 22                                 | 11                                        |
| Vibrionales                     | 11                   | 0                                      | 0                                         | 1                                  | 1                                         |
| Synechococcales                 | 9                    | 6                                      | 5                                         | 5                                  | 5                                         |
| Prochloraceae                   | 8                    | 0                                      | 0                                         | 0                                  | 0                                         |
| unknown                         | 6                    | 1                                      | 1                                         | 4                                  | 3                                         |
| Cellvibrionales                 | 5                    | 5                                      | 4                                         | 7                                  | 5                                         |
| Oceanospirillales               | 5                    | 2                                      | 2                                         | 5                                  | 5                                         |
| Pelagibacterales (SAR11 clade)  | 5                    | 0                                      | 0                                         | 4                                  | 4                                         |
| Rhizobiales                     | 4                    | 1                                      | 1                                         | 8                                  | 4                                         |
| Sphingomonadales                | 4                    | 1                                      | 1                                         | 6                                  | 4                                         |
| Bacillales                      | 3                    | 0                                      | 0                                         | 0                                  | 0                                         |
| Chroococcales                   | 3                    | 3                                      | 2                                         | 3                                  | 2                                         |
| Desulfobacterales               | 3                    | 0                                      | 0                                         | 0                                  | 0                                         |
| Thiotrichales                   | 3                    | 5                                      | 2                                         | 3                                  | 2                                         |
| Campylobacterales               | 2                    | 7                                      | 2                                         | 0                                  | 0                                         |
| Chromatiales                    | 2                    | 2                                      | 2                                         | 3                                  | 2                                         |
| Cytophagales                    | 2                    | 1                                      | 1                                         | 2                                  | 2                                         |
| Oscillatoriales                 | 2                    | 1                                      | 1                                         | 1                                  | 1                                         |
| Planctomycetales                | 2                    | 2                                      | 2                                         | 4                                  | 2                                         |
| unclassifiedGammaproteobacteria | 2                    | 1                                      | 1                                         | 2                                  | 2                                         |
| Acaryochloridaceae              | 1                    | 3                                      | 1                                         | 5                                  | 1                                         |
| Aphanizomenonaceae              | 1                    | 0                                      | 0                                         | 0                                  | 0                                         |
| Aquificaceae                    | 1                    | 1                                      | 1                                         | 0                                  | 0                                         |
| Burkholderiales                 | 1                    | 1                                      | 1                                         | 2                                  | 1                                         |
| Caulobacterales                 | 1                    | 2                                      | 1                                         | 3                                  | 1                                         |
| Chloroflexales                  | 1                    | 1                                      | 1                                         | 2                                  | 2                                         |
| Intrasporangiaceae              | 1                    | 1                                      | 1                                         | 1                                  | 1                                         |

|                                 |            |           |           |            |            |
|---------------------------------|------------|-----------|-----------|------------|------------|
| Lactobacillales                 | 1          | 0         | 0         | 0          | 0          |
| Lentisphaerales                 | 1          | 0         | 0         | 0          | 0          |
| Mariprofundales                 | 1          | 2         | 1         | 1          | 1          |
| Methylophilales                 | 1          | 0         | 0         | 0          | 0          |
| Myxococcales                    | 1          | 1         | 1         | 2          | 1          |
| Nautiliales                     | 1          | 2         | 1         | 0          | 0          |
| Parvularculales                 | 1          | 0         | 0         | 1          | 1          |
| Petrotogales                    | 1          | 0         | 0         | 0          | 0          |
| Porticoccaceae                  | 1          | 0         | 0         | 0          | 0          |
| Rhodocyclales                   | 1          | 0         | 0         | 0          | 0          |
| Rhodospirillales                | 1          | 0         | 0         | 0          | 0          |
| Rivulariaceae                   | 1          | 0         | 0         | 0          | 0          |
| Sphingobacteriales              | 1          | 0         | 0         | 2          | 1          |
| Thermoanaerobacterales          | 1          | 0         | 0         | 0          | 0          |
| unclassifiedActinobacteria      | 1          | 0         | 0         | 0          | 0          |
| unclassifiedAlphaproteobacteria | 1          | 0         | 0         | 1          | 1          |
| unclassifiedFlavobacteriia      | 1          | 2         | 1         | 3          | 1          |
| unclassifiedMethylophilales     | 1          | 0         | 0         | 0          | 0          |
| Verrucomicrobiales              | 1          | 1         | 1         | 0          | 0          |
| Xanthomonadales                 | 1          | 0         | 0         | 1          | 1          |
| Thermococcales                  | 2          | 0         | 0         | 0          | 0          |
| unknown                         | 1          | 0         | 0         | 0          | 0          |
| Methanomicrobiales              | 1          | 0         | 0         | 0          | 0          |
| <b>total</b>                    | <b>177</b> | <b>82</b> | <b>59</b> | <b>175</b> | <b>113</b> |
